# Supplementary material for: An assessment of vaccine wastage in the Solomon Islands
Source: PLOS Glob Public Health. 2022 Jun 9;2(6):e0000572. doi: 10.1371/journal.pgph.0000572 (PMC10021283; doi:10.1371/journal.pgph.0000572)
Supplement: S1 Data — (XLSX) [file pgph.0000572.s002.xlsx]

## Sheet: Vaccine stock 
								Quantities of vaccine
												Wastage
Facility	Province	Vaccine	Date	Received from	Issued to	VVM status 1,2,3,4	Expiry date	No of doses	Bal in doses	administered doses	Doses not admin	Unopened wastage	Balance wastage (doses)	Remarks
603	HCC	Penta	2018-07-11	fridge	P/N	1	2019-12-12	15	243	14
603	HCC	Penta	2018-07-11	P/N	Fridge	1		1	244	0
603	HCC	Penta	2018-07-13	fridge	CWC		2019-12-12	54	190	54
603	HCC	Penta	2018-07-13				2019-12-12	0	190	0
603	HCC	Penta	2018-07-18	fridge	P/N	1	2019-12-12	9	181	8
603	HCC	Penta	2018-07-18	VDC	Fridge			202	250					Stock balance. New stock
603	HCC	Penta	2018-07-20	fridge	P/N			1	249
603	HCC	Penta	2018-07-27	fridge	CWC			48	201
603	HCC	Penta	2018-08-01	fridge	PNC				186
603	HCC	Penta	2018-08-03	fridge	CWC				161
603	HCC	Penta	2018-08-08	fridge	P/N			6	155
603	HCC	Penta	2018-08-10	fridge	CWC			36	119
603	HCC	Penta	2018-08-15	fridge	PN			9	110
603	HCC	Penta	2018-08-17	fridge	CWC			20	90
603	HCC	Penta	2018-08-22	fridge	PN			11	79
603	HCC	Penta	2018-08-24	fridge	CWC			44	79	44	0
603	HCC	Penta		CWC	Fridge			0	35	0
603	HCC	Penta	2018-08-29	fridge	PN			18	17	18
603	HCC	Penta	2018-09-05	fridge				11
603	HCC	Penta	2018-09-07	fridge				33						Month of August and September vaccines order form miss placed and not recorded in this vaccine stock management book.
603	HCC	Penta	2018-09-12	fridge				14
603	HCC	Penta

## Sheet: vaccine stock 2
								Quantities of vaccine
												Wastage
Facility	Province	Vaccine	Date	Received from	Issued to	VVM status 1,2,3,4	Expiry date	No of doses	Bal in doses	administered doses	Doses not admin	Unopened wastage	Balance wastage (doses)	Remarks
603	HCC	Penta	2018-07-11	fridge	P/N	1	2019-12-12	15	243	14
603	HCC	Penta	2018-07-11	P/N	Fridge	1		1	244	0
603	HCC	Penta	2018-07-13	fridge	CWC		2019-12-12	54	190	54
603	HCC	Penta	2018-07-13				2019-12-12	0	190	0
603	HCC	Penta	2018-07-18	fridge	P/N	1	2019-12-12	9	181	8
603	HCC	Penta	2018-07-18	VDC	Fridge			202	250					Stock balance. New stock
603	HCC	Penta	2018-07-20	fridge	P/N			1	249
603	HCC	Penta	2018-07-27	fridge	CWC			48	201
603	HCC	Penta	2018-08-01	fridge	PNC				186
603	HCC	Penta	2018-08-03	fridge	CWC				161
603	HCC	Penta	2018-08-08	fridge	P/N			6	155
603	HCC	Penta	2018-08-10	fridge	CWC			36	119
603	HCC	Penta	2018-08-15	fridge	PN			9	110
603	HCC	Penta	2018-08-17	fridge	CWC			20	90
603	HCC	Penta	2018-08-22	fridge	PN			11	79
603	HCC	Penta	2018-08-24	fridge	CWC			44	79	44	0
603	HCC	Penta		CWC	Fridge			0	35	0
603	HCC	Penta	2018-08-29	fridge	PN			18	17	18
603	HCC	Penta	2018-09-05	fridge				11
603	HCC	Penta	2018-09-07	fridge				33						Month of August and September vaccines order form miss placed and not recorded in this vaccine stock management book.
603	HCC	Penta	2018-09-12	fridge				14
603	HCC	Penta	14/9/18	fridge				26
603	HCC	Penta	19/9/18	fridge				13
603	HCC	Penta	21/09/18	fridge				23
603	HCC	Penta	26/9/18	fridge				14
603	HCC	Penta	28/09/18	fridge				36
603	HCC	Penta	2018-05-10	VDC	Kukum				140
603	HCC	Penta	2018-05-10	VDC				32	108	32	0	0	0
603	HCC	Penta	2018-08-10	fridge	Kukum				229
603	HCC	Penta	2018-10-10	fridge	PN	1	2019-12-12	13	216	13
603	HCC	Penta	2018-10-10	P/N	Fridge	1		0	216	0
603	HCC	Penta	2018-12-10	fridge	CWC	1		30	186	30
603	HCC	Penta	2018-12-10	CWC	Fridge			0	186	0
603	HCC	Penta	17/10/18	fridge	PN			9	177	9	0	0	0
603	HCC	Penta	17/10/18	PN	Fridge			0	177	0	0	0	0
603	HCC	Penta	19/10/18	fridge	CWC			26	151	26	0	0	0
603	HCC	Penta	19/10/18	CWC	Fridge			0	151	0	0	0	0
603	HCC	Penta	24/10/18	fridge	PN			11	140	11	0	0	0
603	HCC	Penta	24/10/18	PN	Fridge			0	140	0	0	0	0
603	HCC	Penta	25/10/18	VDC	Kukum			121	261
603	HCC	Penta	26/10/18	fridge	CWC			26	235	26	0	0	0
603	HCC	Penta	26/10/18	CWC	Fridge			0	235	0	0	0	0
603	HCC	Penta	31/10/18	fridge	PN			11	224
603	HCC	Penta	31/10/18	PN	Fridge		2020-09-12	1	224
603	HCC	Penta	31/10/18	Vura	Kukum			15	239
603	HCC	Penta	2018-02-11	fridge	CWC			34	205
603	HCC	Penta	2018-02-11	CWC	Fridge			0	205
603	HCC	Penta	2018-07-11	fridge	PN			6	199
603	HCC	Penta	2018-07-11	PN	Fridge			0	199
603	HCC	Penta	2018-09-11	KUKUM	CWC				173	26	0	0	0
603	HCC	Penta	16/11/18	KUKUM	CWC				145	28	0	0	0
603	HCC	Penta	21/11/18	KUKUM	PNC				125	20
603	HCC	Penta							106	19				Unrecorded issued doses.
603	HCC	Penta	22/11/18	VDC	KUKUM			244	350
603	HCC	Penta	23/11/18	KUKUM	CWC			220		24
603	HCC	Penta	2018-11-04	fridge	PN	1	17/9/19	0	77	28	0	0	0
603	HCC	Penta	2017-12-04	Pikini clinic	Kukum	1	2019-12-02	200	277
603	HCC	Penta	13/4/18	fridge	CWC	1		20+12		32
603	HCC	Penta	13/4/18	CWC	Fridge			245
603	HCC	Penta	13/4/18	B/BF		1	2019 Dec	245	245		0	0	0
603	HCC	Penta	18/4/18	fridge	PNC	1	2019-12-19	15+2	228	17	0	0	0
603	HCC	Penta	20/4/18	fridge	CWC	1	2019-12-19	30	201	26	0	0	0
603	HCC	Penta	20/4/18	fridge	mobile clinic	1	2019-12-19	2	173	28	0	0	0
603	HCC	Penta	20/4/18	CWC	fridge	1	2019-12-19	4	177	0	0	0
603	HCC	Penta	25/4/18	fridge	CWC	1	2019-12-19	20+1	156	21	0	0
603	HCC	Penta	25/4/18	PN	Fridge	1	2019-12-19	0	0	0	0	0
603	HCC	Penta	23/5/17			1	1905-07-09	100	100		0	0	0	stock take.
603	HCC	Penta	23/5/17	P.C	fridge	1	1905-07-09	250	350		0	0	0	New stock
603	HCC	Penta	2017-01-06	CWC	Fridge			0	0
603	HCC	Penta	2018-06-06	fridge	PN			13	203	13
603	HCC	Penta	13/6/18	fridge	PN	1	2019-12-19	14	89	14
603	HCC	Penta	13/6/18	PN	Fridge	1	2019-12-19	0	0	0
603	HCC	Penta	14/6/18	VDC	Kukum	1	2019-12-01	200	389
603	HCC	Penta	15/6/18	fridge	CWC	1	2019-12-19	46	343	46
603	HCC	Penta	15/6/18	CWC	Fridge	1		0	343	0
603	HCC	Penta	20/6/18	fridge	PN	1	2019-12-19	15	328	13
603	HCC	Penta	21/6/18	PN	Fridge		2019-12-19	2	330	0
603	HCC	Penta	22/6/18	fridge	CWC		2019-12-19	18	312	18
603	HCC	Penta	22/6/18	CWC	Fridge			0	312	0
603	HCC	Penta	18/5/18	fridge	CWC			22	59	22
603	HCC	Penta	18/5/18	CWC	Fridge			0	0	0
603	HCC	Penta	18/5/18	CWC	Fridge			0	0	0
603	HCC	Penta	23/5/18	fridge	PN			16	43	16
603	HCC	Penta	23/5/18	PN	Fridge			0	0	0
603	HCC	Penta	24/5/18	fridge	Immunization			5	5	0
603	HCC	Penta	26/5/18						38			5		vaccines discarded because of power outage.
603	HCC	Penta	30/5/18	fridge	PN/CWC			38	0	38
603	HCC	Penta	30/5/18	CWC	Fridge			0	0	0
603	HCC	Penta	2018-01-06	VDC	Kukum			250	250	0
603	HCC	Penta	2018-01-06	fridge	CWC			25	227	23
603	HCC	Penta	24/5/17	fridge	V/C	1	2017	28	322	28	0	0	0	Stoke take
603	HCC	Penta	31/5/17	fridge	V/C	1	2019-09-11	28	310	28	0	0	0	PNC
603	HCC	Penta	31/5/17	V/C	Fridge	1	2019-09-11	0	310	28	0	0	0	Return to fridge
603	HCC	Penta	2017-02-05	fridge	V/C	1	2019-09-11	44	266	44	0	0	0	CWC
603	HCC	Penta	2017-02-05	V/C	Fridge	1	2019-09-11	0	266	44	0	0	0	Return to fridge
603	HCC	Penta	27/4/18	fridge	CWC			30	156	15	0	15
603	HCC	Penta	27/4/18	CWC	Fridge			15	0	0		15
603	HCC	Penta	2018-01-05					79	235	0	0	0		Vaccine total numbers in fridge
603	HCC	Penta	2018-02-05	fridge	PN	1	2019-12-19	20	215	11	9	0
603	HCC	Penta	2018-02-05	PN	Fridge	1	2019-12-19	9	224	0	0	0
603	HCC	Penta	2018-05-01	fridge	CWC	1	2019-12-19	40	184	23	17	0
603	HCC	Penta	2018-05-01	CWC	Fridge			17	201	0	0	0
603	HCC	Penta	2018-10-05					20	181	0	0	0
603	HCC	Penta	16/5/18	VDC	Kukum	1	2019-12-01	105	100
603	HCC	Penta	16/5/18	fridge	PN	1	2019-12-01	11	81	11
603	HCC	Penta	16/5/18	PN	Fridge	1		0	0	0
603	HCC	Penta	27/5/18	fridge	PN		2019-12-12	13	299	13
603	HCC	Penta	27/6/18	PN	Fridge	1	2019-12-12	0	299	13
603	HCC	Penta	29/6/18	fridge	CWC			27	272	27
603	HCC	Penta	29/6/18	CWC	Fridge			0	272	0
603	HCC	Penta	2018-04-07	fridge	PN			15	257	13
603	HCC	Penta	2018-04-07	PN	Fridge			1	258	0
603	HCC	MR	2018-11-04						80					Stock checked and adjusted
603	HCC	MR	2018-12-04	P/CLINIC	Kukum	1	2019-12-18		200
603	HCC	MR	13/4/18	CWC	Fridge			20		12	8		8
603	HCC	MR	20/4/18	fridge	CWC	1		20		11	9		9
603	HCC	MR	27/4/18	fridge	CWC			30		16	10		4
603	HCC	MR	27/4/18	CWC	Fridge			10		0	10		0
603	HCC	MR	16/5/18	VDC	Kukum		2019-12-18	50	500
603	HCC	MR	18/5/18	fridge	CWC		2019-12-18	15	480	15	5		5
603	HCC	MR	30/5/18	fridge	CWC			5	470	5	5		5
603	HCC	MR	2018-01-06	fridge	CWC			12	450	12	8		8
603	HCC	MR	14/6/18	VDC	Kukum			5	500
603	HCC	MR	15/6/18	fridge	CWC			20	480	12	8		8
603	HCC	MR	15/6/18	CWC	Fridge			0	480	0			0
603	HCC	MR	22/6/18	fridge	CWC			11	469	11	9		9
603	HCC	MR	29/6/18	fridge	CWC			9	460	9	1		1
603	HCC	MR	13/7/18	fridge	CWC		2019-12-18	18	442	18	2	0	2
603	HCC	MR	18/7/18						330					Stock balanace.
603	HCC	MR	27/7/18	fridge	CWC		2019-12-18	20	310	16	4	0	4
603	HCC	MR	2018-03-08	fridge	CWC		2019-12-18	10	300	1	9	0	9
603	HCC	MR	2018-10-08	fridge	CWC		2019-12-18	100	200	10	0	0	0
603	HCC	MR	17/8/18	fridge	CWC		2019-12-18	10	190	5	5	0	5
603	HCC	MR	24/8/18	fridge	CWC		2019-12-18	20	170	13	7	0	7
603	HCC	MR	31/8/18	fridge	CWC		2019-12-18	20	150	13	7	0	7
603	HCC	MR	14/9/18	fridge				20	130	14	6	0	6
603	HCC	MR	21/9/18	fridge				20	110	19	1	0	1
603	HCC	MR	28/9/18	fridge				40	70	33	7	0	7
603	HCC	MR	2018-05-10	fridge				20	50	12	8	0	8
603	HCC	MR	2018-08-10	fridge					770					Physical counting.
603	HCC	MR	2018-12-10	fridge	CWC			17	753	17	3	0	3
603	HCC	MR	2018-12-10	CWC	Fridge			3	750			0
603	HCC	MR	19/10/18	fridge	CWC			15	735	15	5	0	5
603	HCC	MR	19/10/18	CWC	Fridge			5	730	0	5	0	5
603	HCC	MR	26/10/18	fridge	CWC			15	615	15	5	0	5
603	HCC	MR	26/10/18	CWC	Fridge			5	610	0	5	0	5
603	HCC	MR	2018-02-11	fridge	CWC			17	593	17	3	0	3
603	HCC	MR	2018-02-11	CWC	Fridge			3	590	0	3	0	3
603	HCC	MR	16/11/18	KUKUM	CWC				560	10
603	HCC	MR	23/11/18	KUKUM	CWC				550	10
603	HCC	TETOX	23/05/17			1		240	240	0	0	0	0	stock take.
603	HCC	TETOX	25/5/17	fridge	V/C	1		10	230
603	HCC	TETOX	31/8/17						76					Stock take
603	HCC	TETOX	2018-11-04						1000					Stocktake and adjusted
603	HCC	TETOX	16/7/18				2018-09-01		110
603	HCC	TETOX	2018-03-10				2018-09-01					32	320
603	HCC	TETOX	23/10/18						570
603	HCC	Hep B	23/5/17			1		36	36	0	0	0	0	Stock take
603	HCC	Hep B	31/8/17			1		14	14					Stock take
603	HCC	Hep B	2018-11-04						5					Stock checked and adjusted
603	HCC	Hep B	16/7/18				2019-01-05		8
603	HCC	BCG	23/5/17			1		40	40					Stock take
603	HCC	BCG	31/8/17			1		100	100					Stock take
603	HCC	BCG	2018-11-04						260					Stock checked and adjusted
603	HCC	BCG	2018-12-04	PIkini clinic	Kukum	1	2018-08-01		360
603	HCC	BCG	18/4/18	fridge	PNC	1		20	340	1	18		18
603	HCC	BCG	15/6/10	fridge	PNC	1	2019-02-01	10	330	1	9		9
504	Guadalcanal	IPV	22/02/17	GP	GSH	1	2017-12-10	300						No record noted for balance in dose.
504	Guadalcanal	IPV	14/2/17		Tinagulu	1	2017-12-10	10	290
504	Guadalcanal	IPV	21/2/17		Tinagulu	1	2017-12-10	7	283
504	Guadalcanal	IPV	27/2/17		numbu			5	278
504	Guadalcanal	IPV	28/2/17		Tinagulu			7	271
504	Guadalcanal	IPV	28/2/17		lunga			10	261
504	Guadalcanal	IPV	13/3/17		Turaranga	1	2017-12-10	20	241
504	Guadalcanal	IPV	20/3/17		Tinagulu			10	230
504	Guadalcanal	IPV	20/3/17		lunga			10	220
504	Guadalcanal	IPV	2017-03-04		lunga			10	210
504	Guadalcanal	IPV	2017-05-04		GSH	1	2017-12-10	50	145
504	Guadalcanal	IPV	25/04/17		Tinagulu			6	139
504	Guadalcanal	IPV	26/4/17	GSH	numbu			5	134
504	Guadalcanal	IPV	16/5/17		Tinagulu			5	129
504	Guadalcanal	IPV	23/5/17		Tinagulu			6	123
504	Guadalcanal	IPV	2017-07-06	GSH				50	52
504	Guadalcanal	IPV	13/6/17	GSH	Tinagulu			5	47
504	Guadalcanal	IPV	19/6/17	GP	GSH	2	2017-12-11	28	75
504	Guadalcanal	IPV	20/6/17		Tinagulu	2	2017-12-11	6	69
504	Guadalcanal	IPV	20/6/17		numbu	2	2017-12-11	6	63
504	Guadalcanal	IPV	20/6/17	GSH	PHC	2	2017-12-11	50	13
504	Guadalcanal	IPV	27/6/17	GSH	Tinagulu	2	2017-12-11	5	8
504	Guadalcanal	IPV			lunga			6	2
504	Guadalcanal	IPV	28/6/17	GP		1	2017-12-11	30	32
504	Guadalcanal	IPV	2017-09-07		lunga	1	2017-12-11	5	27
504	Guadalcanal	IPV	24/7/17	Pharmacy	numbu	1	2017-12-11	5	22
504	Guadalcanal	IPV	25/7/17	Pharmacy	lunga			5	30
504	Guadalcanal	IPV	26/7/17	GSH	PH/GSH	1		10	20
504	Guadalcanal	IPV	2017-02-08	GSH	PHC	3		7	13
504	Guadalcanal	IPV	22/8/17	Pharmacy	Tinagulu			5	8
504	Guadalcanal	IPV	22/8/17	Pharmacy	lunga			5	3
504	Guadalcanal	IPV	18/10/17		CWF/GSH		2017-12-11	20						No record noted for balance in dose
504	Guadalcanal	IPV	20/11/17	GSH	numbu			3						Balance in dose not recorded
504	Guadalcanal	IPV	22/11/17		PHC			10						Balance in dose not recorded
504	Guadalcanal	IPV	27/11/17						269					Number of dose received not noted.
504	Guadalcanal	IPV	29/11/17	Pharmacy	CWF/GSH			20	249
504	Guadalcanal	IPV	18/12/17	Pharmacy	numbu			3	246
504	Guadalcanal	IPV	2018-10-01	Pharmacy	CWF			5	241
504	Guadalcanal	IPV							55					Number of doses received not noted.
504	Guadalcanal	MR	22/2/17	GP	GSH	1	2019-12-17	1400	1400
504	Guadalcanal	MR	14/2/17		Tinagulu	1	2019-12-17	10	1390
504	Guadalcanal	MR	21/2/17		Tinagulu	1	2019-12-17	10	1380
504	Guadalcanal	MR	27/2/17		numbu	1	2019-12-17	10	1370
504	Guadalcanal	MR	28/2/17		lunga			10	1360
504	Guadalcanal	MR	28/2/17		Tinagulu	1	2019-12-17	10	1350
504	Guadalcanal	MR	13/3/17		Turarana	1	2019-12-17	100	1250
504	Guadalcanal	MR	20/3/17		lunga			10	1240
504	Guadalcanal	MR	20/3/17		Tinaghulu			10	1230
504	Guadalcanal	MR	2017-03-04		lunga			30	1200
504	Guadalcanal	MR	25/4/17		Tinaghulu			10	1190
504	Guadalcanal	MR	26/4/17	GSH	numbu			10	1180
504	Guadalcanal	MR	2017-10-05	GP				500	1680
504	Guadalcanal	MR	16/5/17		Tinaghulu			10	1670
504	Guadalcanal	MR	23/5/17		Tinaghulu			10	1660
504	Guadalcanal	MR	2017-07-06	GSH				100	1560
504	Guadalcanal	MR	13/6/17	GSH	Tinaghulu			10	1550
504	Guadalcanal	MR	20/06/17		numbu			10	1540
504	Guadalcanal	MR	20/06/17					10	1530
504	Guadalcanal	MR	20/06/17	GSH	PHC Team			100	1430
504	Guadalcanal	MR	27/06/17	GSH	Tinaghulu			10	1420
504	Guadalcanal	MR	27/06/17	GSH	lunga			10	1410
504	Guadalcanal	MR	2017-09-07	GSH	lunga			10	1400
504	Guadalcanal	MR	2017-12-07	GSH	PHC			100	1300
504	Guadalcanal	MR	24/07/17	GSH	numbu			10	1290
504	Guadalcanal	MR	25/07/17	Pharmacy	lunga			20	1270
504	Guadalcanal	MR	22/08/17	Pharmacy	Tinaghulu			10	1260
504	Guadalcanal	MR	22/08/17	Pharmacy	lunga			10	1250					Records missing for the month of sept.
504	Guadalcanal	MR	2017-11-10	Pharmacy	PHC			10	1240
504	Guadalcanal	MR	20/11/17	GSH	numbu			10	1230
504	Guadalcanal	MR	27/11/17						1350					Amount in stock
504	Guadalcanal	MR	29/11/17	Pharmacy				20	1330
504	Guadalcanal	MR	29/11/17	Pharmacy				20	1310
504	Guadalcanal	MR	18/12/17		numbu			10	1300
504	Guadalcanal	MR	2018-10-01	Pharmacy	cwc			10	1290
504	Guadalcanal	MR	15/01/18						430					number of vials received not recorded.
504	Guadalcanal	OPV	2017-02-02	GP	GSH	2	2019-10-17	290	290
504	Guadalcanal	OPV	14/02/17		Tinaghulu	2	2019-10-17	10	280
504	Guadalcanal	OPV	21/2/17		tinaghulu	2	2019-10-17	10	270
504	Guadalcanal	OPV	22/2/17		GSH	2	2019-10-17	100	170
504	Guadalcanal	OPV	27/2/17		numbu	2	2019-10-17	10	160
504	Guadalcanal	OPV	28/2/17		Tinaghulu	2	2019-10-17	10	150
504	Guadalcanal	OPV	28/02/17		lunga	2	2019-10-17	10	140
504	Guadalcanal	OPV	2017-06-03	NMS				250	390
504	Guadalcanal	OPV	13/03/17		Turarana		2019-10-17	100	290
504	Guadalcanal	OPV	2017-03-04		lunga			20	270
504	Guadalcanal	OPV	2017-05-04		GSH			100	170
504	Guadalcanal	OPV	25/04/17	GSH	Tinaghulu			10	160
504	Guadalcanal	OPV	26/04/17	GSH	numbu			10	160
504	Guadalcanal	OPV	2017-10-05	GP				30	180
504	Guadalcanal	OPV	16/05/17		Tinaghulu	2	2019-10-17	10	170
504	Guadalcanal	OPV	23/5/17		tinaghulu	2		10	160
504	Guadalcanal	OPV	24/5/17		GSH	2	2019-10-17	20	140
504	Guadalcanal	OPV	2017-07-06		GSH			80	480
504	Guadalcanal	OPV	2017-09-06		PHC SV			100	380
504	Guadalcanal	OPV	13/6/17	GSH	Tinaghulu	2	2019-10-17	10	350
504	Guadalcanal	OPV	19/6/17	GP	GSH	1	2019-10-17	500	850
504	Guadalcanal	OPV	20/6/17		Tinaghulu	1	2019-10-17	10	840
504	Guadalcanal	OPV	20/6/17		numbu	1	2019-10-17	10	830
504	Guadalcanal	OPV	20/6/17		numbu	1	2019-10-17	300	530
504	Guadalcanal	OPV	27/6/17		Tinaghulu	1	2019-10-17	10	530
504	Guadalcanal	OPV	27/6/17		lunga	1	2019-10-17	20	500
504	Guadalcanal	OPV	2017-09-07		lunga			10	490
504	Guadalcanal	OPV	24/7/17	GSH	numbu			10	480
504	Guadalcanal	OPV		Pharmacy				10	470
504	Guadalcanal	OPV	22/8/17	Pharmacy	Tinaghulu			10	460
504	Guadalcanal	OPV	22/8/17	Pharmacy	lunga			20	440
504	Guadalcanal	OPV	15/11/17	GSH	PHC			100	340
504	Guadalcanal	OPV	20/11/17	GSH				10	330
504	Guadalcanal	OPV	27/11/17			2	2019-08-18		840					No proper record entery for number of doses receive.
504	Guadalcanal	OPV	27/11/17	GSH	PHC			100	740
504	Guadalcanal	OPV	29/11/17	Pharmacy	CWF/GSH			100	640
504	Guadalcanal	OPV	29/11/17	Pharmacy				40	600
504	Guadalcanal	OPV	18/12/17	Pharmacy	numbu			10	590
504	Guadalcanal	OPV	2018-10-01						200					No record for numbers of doses received.
504	Guadalcanal	OPV	2018-07-02		PHC/CWF			100	100
504	Guadalcanal	PCV 13	2017-02-02	GP	GSH	1	2018-04-01	168	168
504	Guadalcanal	PCV 13	14/02/17		Tinaghulu	1	2018-10-01	15	153
504	Guadalcanal	PCV 13	15/2/17		GSH		2018-10-01	50	103
504	Guadalcanal	PCV 13	21/2/17		Tinaghulu		2018-10-01	7	96
504	Guadalcanal	PCV 13	28/2/17		GSH	1	2018-10-01	50	46
504	Guadalcanal	PCV 13	28/2/17		numbu			5	41
504	Guadalcanal	PCV 13	28/2/17		Tinaghulu			10	31
504	Guadalcanal	PCV 13	28/2/17		lunga			10	21
504	Guadalcanal	PCV 13	2017-06-03	NMS				400	421
504	Guadalcanal	PCV 13	13/3/17		Turarana	1	2018-10-01	40	381
504	Guadalcanal	PCV 13	15/03/17		GSH			50	331
504	Guadalcanal	PCV 13	20/3/17		lunga			10	321
504	Guadalcanal	PCV 13	20/3/17		GSH			10	311
504	Guadalcanal	PCV 13	21/3/17	GP	Pharmacy			11	211
504	Guadalcanal	PCV 13	23/3/17					20	191
504	Guadalcanal	PCV 13	19/04/17	GSH		1	2018-04-01	50	141
504	Guadalcanal	PCV 13	25/4/17	GSH	Tinaghulu	1		14	127
504	Guadalcanal	PCV 13	26/4/17		numbu			5	122
504	Guadalcanal	PCV 13	16/05/17	GSH	Tinaghulu	1	2018-04-01	7	115
504	Guadalcanal	PCV 13	17/05/17	GP	GSH	1	2018-04-01		675
504	Guadalcanal	PCV 13	17/05/17	GSH	CW	1		200	575
504	Guadalcanal	PCV 13	23/05/17		Tinaghulu	1	2018-04-01	8	567
504	Guadalcanal	PCV 13	13/06/17	GSH	Tinaghulu	1	2017-04-01	7	560
504	Guadalcanal	PCV 13	19/06/17	GP	GSH	1	2018-04-01	450	1010
504	Guadalcanal	PCV 13	20/6/17		Tinaghulu	1	2018-04-01	10	1000
504	Guadalcanal	PCV 13	20/6/17		numbu	1	2018-04-01	10	990
504	Guadalcanal	PCV 13	20/06/17	GSH	PHC	1	2018-04-01	100	890
504	Guadalcanal	PCV 13	27/06/17	GSH	Tinaghulu	1	2018-04-01	10	880
504	Guadalcanal	PCV 13	27/06/17	GSH	lunga	1	2018-04-01	15	865
504	Guadalcanal	PCV 13	2017-05-07		lunga			15	850
504	Guadalcanal	PCV 13	2017-12-07	GSH	PHC	1	2018-04-01	100	750
504	Guadalcanal	PCV 13	14/07/17	GSH	numbu			10	740
504	Guadalcanal	PCV 13	25/07/17	GSH	PHC	1	2018-11-01	100	625
504	Guadalcanal	PCV 13	22/08/17		Tinaghulu			9	614
504	Guadalcanal	PCV 13	22/08/17		lunga			15	559
504	Guadalcanal	PCV 13	18/10/17		CWF			50	509
504	Guadalcanal	PCV 13	2017-02-11		GSH			10	499
504	Guadalcanal	PCV 13	15/11/17	Pharmacy	CWF			50	449
504	Guadalcanal	PCV 13	20/11/17	GSH	numbu			5	444
504	Guadalcanal	PCV 13	22/11/17	GSH	CWF			50	394
504	Guadalcanal	PCV 13							499					Amount in stock
504	Guadalcanal	PCV 13	27/11/17	Pharmacy	PHC			10	489
504	Guadalcanal	PCV 13	29/11/17	Pharmacy	CWF/GSH			20	469
504	Guadalcanal	PCV 13	29/11/17	Pharmacy	CWF/GSH			10	459
504	Guadalcanal	PCV 13	18/12/17		numbu			5	94
504	Guadalcanal	PCV 13	2018-10-01	Pharmacy	CWF			15	79
504	Guadalcanal	PCV 13	25/01/18						304					No record of doses received noted.
504	Guadalcanal	BCG	2017-02-02	GP	GSH	2	2017-10-01	540	540
504	Guadalcanal	BCG	2017-02-02	GP	GSH	1	2017-02-01	1140	1680
504	Guadalcanal	BCG	14/2/17		Tinaghulu	2	2017-10-01	20	1660
504	Guadalcanal	BCG	21/2/17		Tinaghulu	2	2017-10-01	20	1640
504	Guadalcanal	BCG	27/2/17		Tinaghulu		2017-10-01	40	1600
504	Guadalcanal	BCG	27/2/17		numbu		2017-10-01	40	1560
504	Guadalcanal	BCG						1140	380					Discarded
504	Guadalcanal	BCG	13/3/17		turarana	1	2017-10-01	200	180
504	Guadalcanal	BCG	21/3/17		lunga		2017-10-01	20	160
504	Guadalcanal	BCG	21/3/17		Tinaghulu	1	2017-10-01	20	140
504	Guadalcanal	BCG	27/3/17	GP				2000	2140
504	Guadalcanal	BCG	27/3/17		Tinaghulu			60	2080
504	Guadalcanal	BCG	2017-07-04		labour	1	2017-10-01	80	2000
504	Guadalcanal	BCG	25/04/17		Tinaghulu			20	1980
504	Guadalcanal	BCG	26/4/17	GSH	numbu			20	1960
504	Guadalcanal	BCG	16/5/17	GSH	Tinaghulu	1	2017-10-01	20	1940
504	Guadalcanal	BCG	23/05/17		tinaghulu	1	2017-10-01	20	1920
504	Guadalcanal	BCG	2017-07-06	GSH				200	1720
504	Guadalcanal	BCG	13/06/17	GSH	Tinaghulu			20	1700
504	Guadalcanal	BCG						280	840					No dates recorded.
504	Guadalcanal	BCG	20/6/17		numbu			40	800
504	Guadalcanal	BCG	20/06/17		tinaghulu			40	760
504	Guadalcanal	BCG	20/06/17	GSH	PHC team			200	560
504	Guadalcanal	BCG	26/06/17	GSH	Labour	1	2017-10-01	20	540
504	Guadalcanal	BCG	27/06/17	GSH	Tinaghulu	1	2019-10-17	20	520
504	Guadalcanal	BCG	3o/06/17		labour	1	2017-10-01	20	500
504	Guadalcanal	BCG	2017-04-07		lunga			40	460
504	Guadalcanal	BCG	2017-11-07	GSH	labour	1	2017-10-01	40	420
504	Guadalcanal	BCG	20/07/17	GSH	labour	1	2017-10-01	20	400
504	Guadalcanal	BCG	22/07/17	Pharmacy	labour			20	380
504	Guadalcanal	BCG	23/07/17	Pharmacy	labour			100	360
504	Guadalcanal	BCG	24/07/17	Pharmacy	labour			20	260
504	Guadalcanal	BCG		Pharmacy	numbu			20	240
504	Guadalcanal	BCG	26/07/17	Pharmacy	lunga			40	200
504	Guadalcanal	BCG	22/08/17	Pharmacy	Tinaghulu			20	180
504	Guadalcanal	BCG	22/08/17		lunga			40	140
504	Guadalcanal	BCG	18/10/17		GSH/CWF			20	120
504	Guadalcanal	BCG	19/10/17		labour			40						No record of balanace in doses
504	Guadalcanal	BCG	18/11/17		labour			40						No record of balanace in doses
504	Guadalcanal	BCG	27/11/17						740					Amount in stock
504	Guadalcanal	BCG	29/11/17	Pharmacy	GSH/CWF			20	720
504	Guadalcanal	BCG	29/11/17	Pharmacy				20	700
504	Guadalcanal	BCG	2017-01-12	Pharmacy	labour			60	640
504	Guadalcanal	BCG	2017-06-12		PHC			100	540
504	Guadalcanal	BCG	2018-10-01	Pharmacy	child health			20	520
504	Guadalcanal	BCG	15/01/18						1000					no records of doses received
601	HCC	Hep B	20/3/17	VDC	MT		2017-07-01	25	25					clinic closed from April to october 2017.
601	HCC	Hep B	21/3/17	MTC	CWC	1	2017-07-01	1	24	1
601	HCC	Hep B	27/11/17	MTC				13	13					stock adjusted and expired
601	HCC	IPV	20/03/17	VDC	MTC	1	2017-12-11	61	61
601	HCC	IPV	21/3/17	MTC	CWC	1	2017-12-11	11	50	11	0	0	0
601	HCC	IPV	28/3/17	MTC	PNC	1	2017-12-11	5	45	5	0	0	0
601	HCC	IPV	29/3/17	fridge				15	15	0	0	0	0	Stock adjustment
601	HCC	IPV	2017-04-04	fridge	CWC	1	2017-12-11	1	14	1	0	0	0
601	HCC	IPV	23/05/17	MTC Fridge	CWC	1		10	4
601	HCC	IPV	23/5/17	VDC	MTC	1		33	64
601	HCC	IPV	30/5/17	fridge	CWC	1	2017-12-11	17	47	17	0	0	0
601	HCC	IPV	2017-06-06	fridge	CWC	1	2017-06-11	10	37	10	0	0	0
601	HCC	IPV	13/6/17	fridge	CWC	1	13/11/17	11	26	11	0	0	0
601	HCC	IPV	19/6/17	fridge	PNC	1	2017-12-11	1	25	1	0	0	0
601	HCC	IPV	20/6/17	fridge	CWC	1	2017-12-11	11	14	11	0	0	0
601	HCC	IPV	27/6/17	fridge	CWC	1	2017-12-11	4	10	4	0	0	0
601	HCC	IPV	2017-03-07	fridge	CWC	1	2017-12-11	19	24	6	0	0	0
601	HCC	IPV	2017-03-07	CWC	Fridge	1	2017-12-11	6	17	0	0	0	0
601	HCC	IPV	2017-04-07	fridge	CWC	1	2017-12-11	6	17	6	0	0
601	HCC	IPV	2017-08-07	fridge	CWC	1		12	5	12	0	0
601	HCC	IPV	18/7/17	PIkini clinic	MTC	1	18/7/17	16	21	0	0	0
601	HCC	IPV	25/7/17	fridge	CWC	1	25/7/17	21	0	21	0	0
601	HCC	IPV	22/8/17	fridge	CWC	1	25/7/17	23		20	0	0
601	HCC	IPV	22/8/17	CWC	Fridge	1	25/7/17	3		0	0	0	0
601	HCC	IPV	29/8/17	fridge	CWC	1	25/7/17	19		19	0	0	0
601	HCC	IPV	2017-05-09	PIkini clinic	MT/CWC	1	2017-12-11	20	10	10	0	0	0
601	HCC	IPV	2017-11-09	PIkini clinic	MTCWC	1		50	60		0	0	0	New stock
601	HCC	IPV	2017-12-09	MTC Fridge	MT/CWC	1		16	44	16	0	0	0
601	HCC	IPV	19/9/17	fridge	CWC	2		36	8	36	0	0	0
601	HCC	IPV	26/9/17	fridge	CWC	2		8	0	8	0	0	0
601	HCC	IPV	27/9/17	fridge		2		128	128		0	0	0	New stock
601	HCC	IPV	3/10/17/	fridge	CWC	2		7	121	7	0	0	0
601	HCC	IPV	10/10/17/	fridge	CWC	2	2017-12-11	11	110	11	0	0	0
601	HCC	IPV	17/10/17	fridge	CWC	2	2017-12-11	11	99	11	0	0	0
601	HCC	IPV	25/10/17	fridge	CWC		2017-12-11	16	83	16	0	0	0
601	HCC	IPV	31/10/17	fridge	CWC			7	76	7	0	0	0
601	HCC	IPV	2017-07-11	fridge	CWC			6	70	6	0	0	0
601	HCC	IPV	14/11/17	fridge	CWC	1	14/11/17	10	60	10	0	0	0	Incorrect stock record expired.
601	HCC	IPV	21/11/17	fridge	CWC	1	14/11/17	5	55	5	0	0	0	Stock record expired
601	HCC	IPV	27/11/17	fridge	MTC	1	27/11/17	131	131	0	0	0	0	stock adjustment
601	HCC	IPV	18/12/17	PIkini clinic	MTC	1	2019-07-11	50	50	0	0	0	0
601	HCC	IPV	19/12/17	fridge	CWC	1	2019-07-11	20	30	16	0	0	0
601	HCC	IPV	19/12/17	CWC	Fridge	1	2019-07-11	4	34	0	0	0	0
601	HCC	PENTA	20/3/17	VDC	MTC	1	15/4/18	200	200					Stock take.
601	HCC	PENTA	21/3/17	MTC	CWC	1	15/4/18	40	160	27	13	0	0
601	HCC	PENTA	27/3/17	fridge	PNC	1	15/4/18	15	155	12	3	0	0
601	HCC	PENTA	27/3/17	PNC	Fridge	1	15/4/18	3	158	0	0	0	0
601	HCC	PENTA	28/3/17	MTC Fridge	CWC	1	15/4/18	18	140	18	0	0	0
601	HCC	PENTA	29/3/17					0	233	0	0	0	0	Stock adjustment
601	HCC	PENTA	2017-04-04	fridge	PNC	1	15/4/18	7	226	7	0	0	0
601	HCC	PENTA	2017-10-04	fridge	CWC	1	15/4/18	6	220	6	0	0	0
601	HCC	PENTA	2017-11-04	fridge	PNC	1	15/4/18	23	197	23	0	0	0
601	HCC	PENTA	18/4/17	fridge	CWC	1	15/4/18	30	167	30	0	0	0
601	HCC	PENTA	24/4/17	fridge	PNC	1	15/4/18	10	157	10	0	0	0
601	HCC	PENTA	25/4/17	fridge	CWC	1	15/4/18	37	120	37	0	0	0
601	HCC	PENTA	20/4/17	VDC	MTC	1	15/4/18	47	73	47	0	0	0
601	HCC	PENTA	23/4/17	MTC	mobile clinic	1	15/4/18	5	68	5	0	0	0
601	HCC	PENTA	23/5/17	MTC	CWC			27	41	27	0	0	0
601	HCC	PENTA	23/5/17	VDC	MTC	1		132	190	0	0	0	0
601	HCC	PENTA	24/5/17	fridge	CWC	1	15/5/18	27	163	27	0	0	0
601	HCC	PENTA	29/5/17	fridge	PNC	1	15/5/18	12	151	12	0	0	0
601	HCC	PENTA	30/5/17	fridge	CWC	1	15/5/18	19	132	19	0	0	0
601	HCC	PENTA	2017-06-06	fridge	CWC	1	15/5/18	25	107	25	0	0	0
601	HCC	PENTA	2017-12-06	fridge	PNC	1	15/5/18	13	94	13	0	0	0
601	HCC	PENTA	13/6/17	fridge	CWC	1	15/5/18	50	56	27	0	0	0
601	HCC	PENTA	19/6/17	fridge	PNC	1	15/5/18	18	29	18	0	0	0
601	HCC	PENTA	20/6/17	Fridge	MTC/CWC	1	15/5/18	20	39	33	0	0	0
601	HCC	PENTA	26/6/17	fridge	PNC	1	15/5/18	13	19	13	0	0	0
601	HCC	PENTA	27/6/17	fridge	CWC	1	15/5/18	50	56	27	0	0	0
601	HCC	PENTA	2017-03-07	fridge	PNC	1	15/5/18	18	29	18	0	0	0
601	HCC	PENTA	2017-04-07	VDC	MTC	1	15/5/18	1OO			0	0	0
601	HCC	PENTA	2017-04-07	fridge	CWC	1	15/5/18	15	111	15	0	0	0
601	HCC	PENTA	2017-10-09	fridge	PNC	1	15/5/18	9	106	9	0	0	0
601	HCC	PENTA	2017-11-07	fridge	CWC	1	15/5/18	32	74	32	0	0	0
601	HCC	PENTA	17/7/17	fridge	PNC	1	2019-09-11	16	54	16	0	0	0
601	HCC	PENTA	18/7/17	VDC	MTC	1	2019-09-11	115	169	0	0	0	0
601	HCC	PENTA	18/7/17	fridge	CWC	1	2019-09-11	31	138	31	0	0	0
601	HCC	PENTA	24/7/17	fridge	PNC	1	2019-09-11	4	134	4	0	0	0
601	HCC	PENTA	25/7/17	fridge	CWC	1	2019-09-11	60	74	60	0	0	0
601	HCC	PENTA	31/7/17	fridge	PNC	1	2019-09-11	5	52	5	0	0	0
601	HCC	PENTA	2017-01-08	fridge	CWC	1	2019-09-11	17	57	17	0	0	0
601	HCC	PENTA	2017-08-08	fridge	CWC	1	2019-09-11	27	25	27	0	0	0
601	HCC	PENTA	14/8/17	fridge	PNC	1	2019-09-11	13	15	13	0	0	0
601	HCC	PENTA	15/8/17	PIkini clinic	MTC	1	2019-09-11	200	215	0	0	0	0	New stock
601	HCC	PENTA	15/8/17	fridge	CWC	1	2019-09-11	28	197	28	0	0	0
601	HCC	PENTA	21/8/17	fridge	PNC	1	2019-09-11	20	177	17	0	0	0
601	HCC	PENTA	21/8/17	PNC	Fridge	1	2019-11-19	3	180	0	0	0	0
601	HCC	PENTA	22/8/17	fridge	CWC	1	2019-11-19	45	135	43	0	0	0
601	HCC	PENTA	22/8/17	CWC	Fridge	1	2019-11-19	2	137	0	0	0	0
601	HCC	PENTA	28/8/17	fridge	PNC	1	15/8/18	20	117	7	0	0	0
601	HCC	PENTA	28/8/17	PNC	Fridge	1	15/8/18	13	120	0	0	0	0
601	HCC	PENTA	29/8/17	fridge	CWC	1	15/8/18	32	86	29	0	0	0
601	HCC	PENTA	29/8/17	CWC	Fridge	1	15/8/18	3	89	0	0	0	0
601	HCC	PENTA	2017-04-09	fridge	PNC	1	2019-12-19	11	78	11	0	0	0
601	HCC	PENTA	2017-05-09	fridge	CWC	1	2019-09-11	20	58	20	0	0	0
601	HCC	PENTA	2017-11-09	P/CLINIC	MTC	1		100	158	0	0	0	0	New stock
601	HCC	PENTA	2017-11-09	fridge	PNC	1	2019-11-09	11	147	11	0	0	0
601	HCC	PENTA	2017-12-09	fridge	CWC	1	2019-09-11	19	128	19	0	0	0
601	HCC	PENTA	18/9/17	P/CLINIC	PNC	1	2019-09-11	13	115	13	0	0	0
601	HCC	PENTA	19/9/17	MTC Fridge	CWC	1	2019-09-11	36	79	36	0	0	0
601	HCC	PENTA	25/9/17	MTC Fridge	PNC	1	2019-09-11	6	73	6	0	0	0
601	HCC	PENTA	26/9/17	fridge	CWC	1	2019-09-11	35	38	35	0	0	0
601	HCC	PENTA	27/9/17	P/CLINIC	MTC	1		240	278
601	HCC	PENTA	2017-02-10	MTC Fridge	PNC	1	2019-09-11	5	273	5	0	0	0
601	HCC	PENTA	2017-03-10	MTC Fridge	CWC	1	2019-09-11	15	258	15	0	0	0
601	HCC	PENTA	2017-10-10	fridge	CWC	1	2019-09-11	20	238	20	0	0	0
601	HCC	PENTA	2017-09-10	fridge	PNC	1	2019-09-11	7	231	7	0	0	0
601	HCC	PENTA	16/10/17	MTC	PNC	1	2019-09-11	7	224	7	0	0	0
601	HCC	PENTA	17/10/17	fridge	CWC	1	2019-09-11	28	196	28	0	0	0
601	HCC	PENTA	23/10/17	MTC Fridge	PNC	1	2019-09-11	10	186	10	0	0	0
601	HCC	PENTA	24/10/17	fridge	CWC	1	2019-09-11	25	161	25	0	0	0
601	HCC	PENTA	30/10/17	fridge	PNC	1	2019-09-11	10	151	10	0	0	0
601	HCC	PENTA	31/10/17	fridge	CWC	1	2019-09-11	12	139	12	0	0	0
601	HCC	PENTA	2017-06-11	fridge	PNC	1		11	128	11	0	0	0
601	HCC	PENTA	2017-07-11	fridge	CWC	1		12	116	12	0	0	0
601	HCC	PENTA	13/11/17	fridge	PNC	1		10	106	10	0	0	0
601	HCC	PENTA	14/11/17	fridge	CWC	1		30	76	30	0	0	0
601	HCC	PENTA	20/11/17	fridge	CWC	1		10	66	10	0	0	0
601	HCC	PENTA	21/11/17	fridge	CWC			13	53	13	0	0	0
601	HCC	PENTA	27/11/17		MTC	1	2019-09-19		26	0	0	0	0	STOCK ADJUSTMENT
601	HCC	PENTA	28/11/17	fridge	CWC	1	2019-09-19	15	11	15	0	0	0	POWER OFF
601	HCC	PENTA	28/11/17	P/CLINIC	MTC	1	2018-05-01	189	200	0	0	0	0	New stock
601	HCC	PENTA	28/11/17	MTC	CWC	1	2019-09-19	12	189	11	0	0	0	1 DOSE LEFT
601	HCC	PENTA	28/11/17			1	2019-09-19	1	190	0	0	0	0
601	HCC	PENTA	2017-04-12	fridge	PNC	1	2019-09-19	10	180	3	0	0	0	7 VIALS LEFT
601	HCC	PENTA	2017-04-12	fridge	PNC	1	2019-09-19	7	187	0	0	0	0
601	HCC	PENTA	2017-05-12	fridge	CWC	1	2019-09-19	16	171	16	0	0	0	All vials used
601	HCC	PENTA	2017-05-12	CWC	Fridge	1	2019-09-19	0	171	0	0	0	0	STOCK
601	HCC	PENTA	2017-11-12	fridge	PNC	1	2019-09-19	10	161	4	0	0	0	6 VIAS LEFT
601	HCC	PENTA	2017-11-12	PNC	Fridge	1	2019-09-19	6	167	0	0	0	0	STOCK
601	HCC	PENTA	2017-12-12	fridge	CWC	1	2019-09-19	25	142	20	0	0	0	5 Vials left
601	HCC	PENTA	2017-12-12	CWC	Fridge	1	2019-09-19	5	147	0	0	0	0	Stock
601	HCC	PENTA	18/12/17	fridge	PNC	1	2019-09-19	15	132	12	0	0	0	3 Vials left
601	HCC	PENTA	18/12/17	PNC	Fridge			3	135	0	0	0	0	Stock
601	HCC	PENTA	19/12/17	fridge	CWC	1	2019-09-19	40	95	33	0	0	0	7 VIALS LEFT
601	HCC	PENTA	19/12/17	CWC	Fridge	1	2019-09-19	7	102	0	0	0	0	Stock
601	HCC	PENTA	19/12/17	fridge		1	2019-09-19	5	107	0	0	0	0	Stock adjustment
601	HCC	TETOX	20/3/17	VDC	MTC			220	220
601	HCC	TETOX	23/3/17	MTC	PNC	1	2018-09-01	20		17	3	0	0
601	HCC	TETOX	20/4/17	VDC	MTC	1	2019-09-18	19
601	HCC	TETOX	2017-06-04	MTC Fridge	mobile clinic	1	2018-09-01	110						school visit
601	HCC	TETOX	23/5/17	VDC	mtc clinic	1		100	100	0	0	0	0
601	HCC	TETOX	2017-04-05	fridge	ANC	1	2019-09-18	20	80	15	0	0	0	5 doses left for next used
601	HCC	TETOX	2017-04-05	ANC	Fridge	1	2018-09-01	5	85	0	0	0	0
601	HCC	TETOX	2017-11-05	fridge	ANC	1	2018-09-01	15	70	15	0	0	0
601	HCC	TETOX	18/5/17	fridge	ANC	1	2018-09-01	20	50	13	0	0	0	7 dose left for next use.
601	HCC	TETOX	18/5/17	ANC	Fridge	1	2018-09-01	7	57	0	0	0	0
601	HCC	TETOX	25/5/17	fridge	ANC	1		22	32	22	0	0	0
601	HCC	TETOX	2017-01-06	fridge	ANC	1	2018-09-01	50	82	18	0	0	0
601	HCC	TETOX	2017-01-06	ANC	Fridge	1	2018-09-01	0	64	0	0	0	0
601	HCC	TETOX	2017-08-06	fridge	ANC	1	2018-09-01	18	46	18	0	0	0
601	HCC	TETOX	18/6/17	fridge	ANC	1	2018-09-01	17	29	17	0	0	0
601	HCC	TETOX	22/6/17	fridge	ANC	1	2018-09-01	11	180	11	0	0	0
601	HCC	TETOX	29/6/17	fridge	ANC	1	2018-09-01	5	130	5	0	0	0
601	HCC	TETOX	2017-03-07	PIkini clinic	MTC/ANC		2018-09-01	40	230	0	0	0	0
601	HCC	TETOX	2017-06-07	fridge	ANC	1	2018-09-01	30	200	23	0	0	0
601	HCC	TETOX	2017-06-07	ANC	Fridge	1	2018-09-01	7	207	0	0	0	0
601	HCC	TETOX	13/7/17	fridge	ANC	1	2018-09-01	16	191	16	0	0	0
601	HCC	TETOX	20/7/17	fridge	ANC	1	2018-09-01	21	170	16	0	0	0
601	HCC	TETOX	20/7/17	ANC	Fridge	1	2018-09-01	5	175	0	0	0	0
601	HCC	TETOX	27/7/17	fridge	ANC	1	2018-09-01	14	161	14	0	0	0
601	HCC	TETOX	2017-03-08	fridge	ANC	1	2018-09-01	12	151	12	0	0	0
601	HCC	TETOX	15/8/17	PIkini clinic	MTC/ANC	1		210	230	0	0	0	0	New stock
601	HCC	TETOX	17/8/17	fridge	ANC	1	2018-09-01	20	218	12	0	0	0	8 Doses left
601	HCC	TETOX	24/8/17	fridge	ANC	1	2018-09-01	18	208	10	0	0	0
601	HCC	TETOX	31/8/17	fridge	ANC	1	2018-09-01	17	198	17	0	0	0
601	HCC	TETOX	31/8/17	ANC	Fridge	1	2018-09-01	1	199	0	0	0	0
601	HCC	TETOX	2017-07-09	Fridge			SEP 2018	14	189	14	0	0	0	6 Doses left.
601	HCC	TETOX	14/9/17	fridge	ANC	1	2019-09-18	12	177	12				6 DOSES FOR NEXT WEEK
601	HCC	TETOX	21/9/17	fridge	ANC	1	2018-09-01	15	162	15				1 DOSE NEXT WK
601	HCC	TETOX	28/9/17	fridge	ANC	1	2018-09-01	16	146	16	0	0	0	2 DOSES NEXT WK
601	HCC	TETOX	28/9/17	fridge	OPD	1	2018-09-01	8	138	8	0	0	0	4 DOSES NEXT WK
601	HCC	TETOX	2017-05-10	fridge	ANC	1		15	123	15	0	0	0	9 DOSES NEXT WK
601	HCC	TETOX	2017-11-10	fridge	OPD	1	2018-09-01	6	117	6	0	0	0	3 DOSES LEFT FOR NEXT WK
601	HCC	TETOX	2017-12-10	fridge	ANC			15	102	15	2	0	0	2 DOSES LEFT FOR NEXT SESSION
601	HCC	TETOX	19/11/17	fridge	ANC	1	2018-09-01	14	88	14	2	0	0	2 DOSES LEFT FOR NEXT SESSION
601	HCC	TETOX	26/10/17	fridge	ANC	1	2018-09-01	11	77	11		0	0
601	HCC	Hep B	2018-04-06	MTC	MR	1	2019-01-05	15	15					STOCK IN FROM VDC
601	HCC	Hep B	2018-11-06	MTC	MR campain	1	2019-01-05	1	14	0	0	0	1 vial
601	HCC	Hep B	2018-11-06	mr campaign	MTC/Fridge	1	2019-01-05	1	15	0	0	0	0
601	HCC	Hep B	26/6/18	mr campaign	MTC/Fridge	1	2019-01-05	10	10					Balance brought forward
601	HCC	Hep B	14/8/18	fridge	CWC	1	2019-01-05	1	9	1	0	0	0	Single dose
601	HCC	Hep B	14/8/18	CWC	MTC/Fridge	1	2019-01-05	0	9	0	0	0	0
601	HCC	Hep B	2018-03-09	MTC/Fridge	PNC	1	2019-01-05	1	8	1	0	0	0
601	HCC	Hep B	2018-03-09	PNC	MTC	1	2019-01-05	0	8	0	0	0	0	STOCK
601	HCC	Hep B	2018-04-09	MTC	CWC	1	2019-01-05	1	7	1	0	0	0	single dose vial
601	HCC	Hep B	2018-04-09	CWC	MTC	1	2019-01-05	0	7	0	0	0	0	STOCK
601	HCC	Hep B	2018-01-10	VDC	MTC	1	2019-01-05	3	10					New stock
601	HCC	Hep B	23/10/18	VDC	mtc	1	2019-01-05		20					Stock adjustment
601	HCC	Hep B	2018-04-12	MTC	CWC	1			19					Stock take.
601	HCC	IPV	2018-02-01			1	2019-07-11	34	34	0	0	0	0	Balance brought forward
601	HCC	IPV	2018-02-01	fridge	CWC	1	2019-07-11	20	14	15	0	0	0	5 Vials left
601	HCC	IPV	2018-02-01	CWC	Fridge	1	2019-07-11	5	19	0	0	0	0	STOCK
601	HCC	IPV	2018-09-01	fridge	CWC	1	2019-07-11	19	0	16	0	0	0	3 DOSES LEFT
601	HCC	IPV	2018-09-01	CWC	Fridge	1	2019-07-11	3	3	0	0	0	0	STOCK
601	HCC	IPV	16/1/18	PIkini clinic	MTC/Fridge	1	2019-07-11	50	53	0	0	0	0	STOCK
601	HCC	IPV	16/1/18	fridge	CWC	1	2019-07-11	20	33	11	0	0	0	9 Doses left
601	HCC	IPV	16/1/18	CWC	Fridge	1	2019-07-11	9	42	0	0	0	0	STOCK
601	HCC	IPV	23/1/18	fridge	CWC	1	2019-07-11	15	27	11	0	0	0	4 Doses left
601	HCC	IPV	23/1/18	CWC	Fridge	1	2019-07-11	4	31	0	0	0	0	STOCK
601	HCC	IPV	30/1/18	fridge	CWC	1	2019-07-11	15	16	2	0	0	0	13 DOSES LEFT
601	HCC	IPV	30/1/18	CWC	Fridge	1	2019-07-11	13	29	0	0	0	0	Stock
601	HCC	IPV	2018-02-02	MTC/Fridge	Pikinini clinic	1	2019-07-11	0	29					Stock check
601	HCC	IPV	2018-09-04	PIkini clinic	MTC/Fridge	1	2019-07-12	40	40	0	0	0	0	New stock
601	HCC	IPV	2018-10-04	MTC/Fridge	CWC	1	2019-07-12	25	15	21	0	0	0	4 VIALS LEFT
601	HCC	IPV	2018-10-04	CWC	Fridge	1	2019-07-12	4	19	0	0	0	0	STOCK
601	HCC	IPV	17/4/18	MTC	CWC	1	2019-07-12	6	13	5	0	0	0	1 Vial left
601	HCC	IPV	17/4/18	CWC	MTC	1	2019-07-12	1	14	0	0	0	0	STOCK
601	HCC	IPV	18/4/18	MTC				34	34	0	0	0	0	Stock adjustment
601	HCC	IPV	23/4/18	P/CLINIC	MTC/Fridge	1	2019-07-12	60	94	0	0	0	0	New and old stock
601	HCC	IPV	24/4/18	MTC	CWC	1	2019-07-12	25	69	19	0	0	0	6 Vials left
601	HCC	IPV	24/4/18	CWC	mtc	1	2019-07-12	6	75	0	0	0	0	stock
601	HCC	IPV	2018-01-05	MTC	CWC	1	2019-07-12	17	58	3	0	0	0	14 Vials left
601	HCC	IPV	2018-01-05	CWC	MTC	1	2019-07-12	14	72	0	0	0	0	STOCK
601	HCC	IPV	2018-07-05	,MTC	PNC	1	2019-07-11	20	52	16	0	0	0	4 VIALS LEFT
601	HCC	IPV	2018-07-05	PNC	MTC	1	2019-07-11	4	56	0	0	0	0	STOCK
601	HCC	IPV	2018-08-05			1	17/12/19	29	29					Balance stock
601	HCC	IPV	15/5/18	MTC	CWC	1	17/12/19	10	19	7	0	0	0	Stock vaccines return to VDC friedge not in service.
601	HCC	IPV	2018-04-06	VDC	MTC	1	2019-07-11	100	100					STOCK IN FROM VDC
601	HCC	IPV	2018-05-06	MTC	CWC	1	2019-07-11	15	85	6	0	0	0	9 Vials left
601	HCC	IPV	2018-05-06	CWC	MTC	1	2019-07-11	9	94	0	0	0	0	Stock
601	HCC	IPV	2018-11-06	MTC	MR/Campaign	1	2019-07-11	10	84	1	0	0	0	9 Vials left
601	HCC	IPV	2018-11-06	mr campaign	MTC	1	2019-07-11	9	93	0	0	0	0	stock
601	HCC	IPV	2018-12-06	,MTC	CWC	1	2019-07-11	30	63	19	0	0	0	11 vials left
601	HCC	IPV	2018-12-06	cwc	MTC	1	2019-07-11	11	74	0	0	0	0	STOCK
601	HCC	IPV	2018-12-06	MTC	Mobile team	1	2019-07-11	3	71					mobile team
601	HCC	IPV	2018-12-06	VDC	MTC	1	2019-07-11	7	78	0	0	0	0	New stock
601	HCC	IPV	19/6/18	MTC	CWC	1	2019-07-11	20	58	11	0	0	0	8 vials left
601	HCC	IPV	19/6/18	CWC	MTC	1	2019-07-11	8	66	0	0	0	0	STOCK
601	HCC	IPV	26/6/18			1	2019-07-11	73	73					Balance brought forward
601	HCC	IPV	26/6/18	MTC	CWC	1	2019-07-11	20	53	17	0	0	0	3 Vials left
601	HCC	IPV	26/6/18	CWC	MTC	1	2019-07-11	3	56	0	0	0	0	STOCK
601	HCC	IPV	2018-03-07	MTC	CWC	1	2019-07-11	20	36	11	0	0	0	9 Vials left
601	HCC	IPV	2018-03-07	CWC	MTC	1	2019-07-11	9	45	0	0	0	0	STOCK
601	HCC	IPV	2018-10-07	MTC	CWC	1	2019-07-11	15	30	4	0	0	0	11 vials left
601	HCC	IPV	2018-10-07	CWC	MTC	1	2019-07-11	11	41	0	0	0	0	STOCK
601	HCC	IPV	17/7/18	MTC	CWC	1	2019-07-11	10	31	7	0	0	0	3 Vials left
601	HCC	IPV	17/7/18	CWC	MTC	1	2019-07-11	3	34	0	0	0	0	STOCK
601	HCC	IPV	18/7/18	VDC	MTC	1	2019-07-11	55	89					STOCK
601	HCC	IPV	24/7/18	MTC	CWC	1	2019-07-11	20	69	19	0	0	0	1 Vial left
601	HCC	IPV	24/7/18	CWC	MTC	1	2019-07-11	1	70	0	0	0	0	STOCK
601	HCC	IPV	31/7/18	MTC/Fridge	CWC	1	2019-07-11	15	55	2	0	0	0	13 Vials left
601	HCC	IPV	31/7/18	CWC	MTC	1	2019-07-11	13	68	0	0	0	0	STOCK
601	HCC	IPV	2018-06-08	MTC	PNC	1	2019-07-11	1	67	1	0	0	0	Full vial used
601	HCC	IPV	2018-06-08			1	2019-07-11	67	67					Balance brought forward
601	HCC	IPV	2018-06-08	CWC	MTC	1	2019-07-11	0	67					STOCK
601	HCC	IPV	2018-07-08	MTC	CWC	1	2019-07-11	26	41	12	0	0	0	14 Vials left
601	HCC	IPV	2018-07-08	CWC	MTC	1	2019-07-11	14	55	0	0	0	0	STOCK
601	HCC	IPV	14/8/18	MTC	CWC	1	2019-07-11	15	40	6	0	0	0	9 Vials left
601	HCC	IPV	14/8/18	CWC	MTC	1	2019-07-11	9	49	0	0	0	0	STOCK
601	HCC	IPV	20/8/18	VDC	MTC	1	2019-07-11	0	49					STOCK
601	HCC	IPV	21/8/18	MTC	CWC	1	2019-07-11	20	29	14	0	0	0	6 Vials left
601	HCC	IPV	21/8/18	CWC	MTC	1	2019-07-11	6	35	0	0	0	0	STOCK
601	HCC	IPV	28/8/18	MTC	CWC	1	2019-07-11	15	20	11	0	0	0	4 VIALS LEFT
601	HCC	IPV	28/8/18	CWC	MTC	1	2019-07-11	4	24	0	0	0	0	STOCK
601	HCC	IPV	2018-04-09	MTC	CWC	1	2019-07-11	15	9	12	0	0	0	3 Vials left
601	HCC	IPV	2018-04-09	CWC	MTC	1	2019-07-11	3	12	0	0	0	0	STOCK
601	HCC	IPV	2018-10-09	MTC	PNC	1	2019-07-11	1	11	1	0	0	0	Full vial used
601	HCC	IPV	2018-10-09	PNC	MTC	1	2019-07-11	0	11	0	0	0	0	STOCK
601	HCC	IPV	2018-11-09			1	2019-07-11	11	11					Balance brought forward
601	HCC	IPV	2018-11-09	MTC	CWC	1	2019-07-11	5	6	1	0	0	0	4 VIALS LEFT
601	HCC	IPV	2018-11-09	CWC	MTC	1	2019-07-11	4	10	0	0	0	0	STOCK
601	HCC	IPV	17/9/18			1		18	18					STOCK
601	HCC	IPV	17/9/18	MTC	CWC	1	2019-07-11	18	0	12	0	0	0	6 Vials left
601	HCC	IPV	18/9/18	CWC	MTC	1	2019-07-11	6	6	0	0	0	0	STOCK
601	HCC	IPV	25/9/18	VDC	MTC	1	2019-07-11	20	26					STOCK
601	HCC	IPV	25/9/18	MTC	CWC	1	2019-07-11	20	6	17	0	0	0	3 Vials left
601	HCC	IPV	25/9/18	CWC	MTC	1	2019-07-11	3	9	0	0	0	0	STOCK
601	HCC	IPV	2018-02-10	MTC	CWC	1	2019-07-11	9	0	3	0	0	0	6 Vials left
601	HCC	IPV	2/1O/18	CWC	MTC	1	2019-07-11	6	6	0	0	0	0	STOCK
601	HCC	IPV	2018-08-10	MTC	PNC	1		1	5	1	0	0	0	Full vial used
601	HCC	IPV	2018-08-10	PNC	MTC	1	2019-07-11	0	5	0	0	0	0	STOCK
601	HCC	IPV	9/1O/18	MTC	CWC	1	2019-07-11	5	0	1	0	0	0	4 VIALS LEFT
601	HCC	IPV	2018-09-10	CWC	MTC	1	2019-07-11	4	4	0	0	0	0	STOCK
601	HCC	IPV	2018-09-10			1	2019-07-11	4	4					Balance brought forward
601	HCC	IPV	16/10/18						1					Stock adjustment
601	HCC	IPV	16/10/18	VDC	MTC	1	2019-07-11	70	71					New stock
601	HCC	IPV	23/10/18						40					Stock adjustment
601	HCC	IPV	23/10/18	VDC	MTC	1	2019-07-11	60	100	0	0	0	0	STOCK
601	HCC	IPV	2018-04-12			1	2019-07-11		38					STOCK
601	HCC	IPV	2018-10-12	VDC	MTC	1		162	200					New stock
601	HCC	TETOX	23/01/18	MTC		1	2018-09-01	66	66	0	0	0	0	B/F Stock adjustement
601	HCC	TETOX	24/01/18	fridge	OPD	1	2018-09-01	2	64	2	0	0	0
601	HCC	TETOX	25/01/18	fridge	ANC	1	2018-09-01	14	50	13 ANC	0	0	0	1 DOSE LEFT
601	HCC	TETOX	25/01/18	ANC	Fridge	1	2018-09-01	1	51	0	0	0	0	STOCK
601	HCC	TETOX	30/01/18	fridge	OPD	1	2018-09-01	1	50	0	0	0	0	STOCK
601	HCC	TETOX	2018-01-02	fridge	ANC	1	2018-09-01	22	28	22	0	0	0	STOCK
601	HCC	TETOX	2018-09-04	P/CLINIC	MTC	1	2018-09-01	110	110		0	0	0	New stock/ Feb & Mar clinic close for renovation
601	HCC	TETOX	2018-09-04	MTC	OPD	1	2018-09-01	10	100	1	0	0	0	9 Doses left
601	HCC	TETOX	2018-09-04	OPD	MTC	1	2018-09-01	9	109	0	0	0	0	STOCK
601	HCC	TETOX	2018-12-04	MTC	ANC	1	2018-09-01	19	90	16	0	0	0	3 DOSES LEFT
601	HCC	TETOX	2018-12-04	ANC	MTC	1	2018-09-01	3	93	0	0	0	0	STOCK
601	HCC	TETOX	19/4/18	MTC	ANC	1	2018-09-01	23	70	17	0	0	0	6 Doses left.
601	HCC	TETOX	19/4/18	ANC	MTC	1	2018-09-01	6	76	0	0	0	0	STOCK
601	HCC	TETOX	26/4/18	fridge	ANC	1	2018-09-01	16	60	11	0	0	0	5 doses left for next used
601	HCC	TETOX	26/4/18	ANC	MTC	1	2018-09-01	5	65	0	0	0	0	Balance brought forward
601	HCC	TETOX	2018-03-05	MTC	ANC	1	2018-09-01	20	45	19	0	0	0	1 DOSE LEFT
601	HCC	TETOX	2018-03-05	ANC	MTC	1	2018-09-01	1	46	0	0	0	0	STOCK
601	HCC	TETOX	2018-10-05	MTC	ANC	1	2018-09-01	30	16	21	0	0	0	9 Doses left
601	HCC	TETOX	2018-10-05	ANC	MTC	1	2018-09-01	9	25	0	0	0	0	Stock vaccine return to VDC.
601	HCC	TETOX	2018-04-06	VDC	MTC	1	2018-09-01	230	230					STOCK IN FROM VDC
601	HCC	TETOX	14/6/18	MTC	ANC	1	2018-09-01	20	210	18				2 DOSE LEFT
601	HCC	TETOX	14/6/18	ANC	MTC	1	2018-09-01	2	212	0	0	0	0	STOCK
601	HCC	TETOX	21/6/18	MTC	ANC	1	2018-09-01	20	192	18	0	0	0	2 DOSES LEFT
601	HCC	TETOX	21/6/18	ANC	MTC	1	2018-09-01	2	194	0	0	0	0	STOCK
601	HCC	PCV	2018-02-01			1	2019-04-19	99	99	0	0	0	0	Balance brought forward
601	HCC	PCV	2018-02-01	fridge	CWC	1	2019-04-19	30	69	25	0	0	0	5 Vials left
601	HCC	PCV	2018-02-01	CWC	Fridge	1	2019-04-19	5	74	0	0	0	0	STOCK
601	HCC	PCV	2018-08-01	fridge	PNC	1	2019-04-19	20	54	15	0	0	0	5 Vials left
601	HCC	PCV	2018-08-01	PNC	Fridge	1	2019-04-19	5	59	0	0	0	0	STOCK
601	HCC	PCV	2018-09-01	fridge	CWC	1	2019-04-19	30	29	25	0	0	0	5 Vials left
601	HCC	PCV	2018-09-01	CWC	Fridge	1	2019-04-19	5	34	0	0	0	0	STOCK
601	HCC	PCV	16/1/18	P/CLINIC	MTC	1	2019-04-19	0	34	0	0	0	0	STOCK
601	HCC	PCV	16/1/18	fridge	CWC	1	2019-04-19	34	0	34	0	0	0	0 Vials left
601	HCC	PCV	16/1/18	CWC	Fridge	1	2019-04-19	0	1	0	0	0	0	FOUND IN STOCK
601	HCC	PCV	22/1/18	fridge	PNC	1	2019-04-19	0	1	0	0	0	0	STOCK
601	HCC	PCV	29/1/18	fridge	PNC	1	2019-04-19	1	0	1	0	0	0
601	HCC	PCV	29/1/18	PNC	Fridge	1	2019-04-19	0	0	0	0	0	0	STOCK
601	HCC	PCV	2018-10-04	P/CLINIC	MTC/Fridge	1	2019-09-20	200	200	0	0	0	0	NEW STOCK
601	HCC	PCV	1O/4/18	MTC	CWC	1	2019-09-20	60	140	58	0	0	0	2 VIALS LEFT
601	HCC	PCV	1O/4/18	CWC	Fridge	1	2019-09-20	2	142	0	0	0	0	STOCK
601	HCC	PCV	16/4/18	fridge	PNC	1	2019-09-20	11	131	10	0	0	0	1 Vial left
601	HCC	PCV	16/4/18	PNC	Fridge	1	2019-09-20	1	132	0	0	0	0	STOCK
601	HCC	PCV	17/4/18	fridge	CWC	1	2019-09-20	30	102	25	0	0	0	5 Vials left
601	HCC	PCV	17/4/18	cwc	Fridge	1	2019-09-20	5	107	0	0	0	0	STOCK
601	HCC	PCV	18/4/18	fridge				120	120	0	0	0	0	STOCK
601	HCC	PCV	23/4/18	P/CLINIC	MTC	1	2020-09-01	95	215	0	0	0	0	NEW STOCK
601	HCC	PCV	23/4/18	MTC	PNC	1		15	200	6	0	0	0	9 Vials left
601	HCC	PCV	23/4/18	PNC	MTC	1	2019-09-20	9	209	0	0	0	0	STOCK
601	HCC	PCV	24/4/18	MTC	CWC	1	2019-09-20	40	169	35	0	0	0	5 Vials left
601	HCC	PCV	24/4/18	CWC	MTC	1	2019-09-20	5	174	0	0	0	0	STOCK
601	HCC	PCV	30/4/18	MTC	PNC	1	2019-09-20	10	164	7	0	0	0	3 Vials left
601	HCC	PCV	30/4/18	PNC	Fridge	1	2019-09-19	3	167	0	0	0	0	STOCK
601	HCC	PCV	2018-01-05			1	2020-01-01	167	167	0	0	0	0	Balance brought forward
601	HCC	PCV	2018-01-05	MTC	CWC	1	2020-01-01	10	157	3	0	0	0	7 VIALS LEFT
601	HCC	PCV	1/5/1`8	CWC	MTC	1	2020-01-01	7	164	0	0	0	0	STOCK
601	HCC	PCV	2018-07-05	MTC	PNC	1	2020-01-01	20	144	16	0	0	0	4 VIALS LEFT
601	HCC	PCV	2018-07-05	PNC	MTC	1	2020-01-01	4	148	0	0	0	0	STOCK
601	HCC	PCV	2018-08-05	MTC	CWC	1	2020-01-01	30	118	29	0	0	0	1 Vial left
601	HCC	PCV	2018-08-05	CWC	MTC	1	2020-01-01	1	119	0	0	0	0	STOCK
601	HCC	PCV	15/5/18	P/CLINIC	CWC	1	2020-01-01	20	99	17	0	0	0	3 Vials left
601	HCC	PCV	15/5/18	CWC	P/CLINIC	1	2020-01-01	3	102	0	0	0	0	STOCK
601	HCC	PCV	22/5/18	P/CLINIC	CWC	1	2020-01-01	60	42	54	0	0	0	6 Vials left
601	HCC	PCV	22/5/18	CWC	P/CLINIC	1	2020-01-01	6	48	0	0	0	0	Stock vaccines return to VDC
601	HCC	PCV	2018-04-06	VDC	MTC	1	2020-01-01	200	200					STOCK IN FROM VDC
601	HCC	PCV	2018-04-06	MTC	PNC	1	2020-01-01	10	190	8	0	0	0	2 VIALS LEFT
601	HCC	PCV	2018-04-06	PNC	MTC	1	2020-01-01	2	192	0	0	0	0	STOCK
601	HCC	PCV	2018-05-06	MTC	CWC	1	2020-01-01	25	167	23	0	0	0	2 VIALS LEFT
601	HCC	PCV	2018-05-06	CWC	MTC	1	2020-01-01	2	169	0	0	0	0	STOCK
601	HCC	PCV	2018-11-06	MTC	PNC	1	2020-01-01	15	154	11	0	0	0	4 VIALS LEFT
601	HCC	PCV	2018-11-06	PNC	MTC	1	2020-01-01	4	158	0	0	0	0	STOCK
601	HCC	PCV	2018-11-06	MTC	MR/Campaign	1	2020-01-01	10	148	0	0	0	0	10 VIALS LEFT
601	HCC	PCV	2018-11-06	mr campaign	MTC	1	2020-01-01	10	158	0	0	0	0	STOCK
601	HCC	PCV	2018-12-06	MTC	CWC	1	2020-01-01	30	128	23	0	0	0	7 VIALS LEFT
601	HCC	PCV	2018-12-06	CWC	MTC	1	2020-01-01	7	135	0	0	0	0	STOCK
601	HCC	PCV	2018-12-06	MTC	Mobile team	1	2020-01-01	5	130					mobile team
601	HCC	PCV	2018-12-06	VDC	MTC	1	2020-01-01	61	191	0	0	0	0	NEW STOCK
601	HCC	PCV	19/6/18	MTC	CWC	1	2020-01-01	30	161	27	0	0	0	3 Vials left
601	HCC	PCV	19/6/18	CWC	MTC	1	2020-01-01	3	164	0	0	0	0	STOCK
601	HCC	PCV	20/6/18			1	2020-01-01	164	164					Balance brought forward
601	HCC	PCV	20/6/18	MTC	OPD	1	2020-01-01	1	163	1	0	0	0	STOCK
601	HCC	PCV	23/6/18	MTC	PNC	1	2020-01-01	10	153	4	0	0	0	6 Vials left
601	HCC	PCV	25/6/18	PNC	MTC	1	2020-01-01	6	159	0	0	0	0	STOCK
601	HCC	PCV	26/6/18			1	2020-01-01	161	161					Balance brought forward
601	HCC	PCV	26/6/18	MTC	CWC	1	2020-01-01	35	126	31	0	0	0	4 VIALS LEFT
601	HCC	PCV	26/6/18	CWC	MTC	1	2020-01-01	4	130	0	0	0	0	STOCK
601	HCC	PCV	2018-02-07	MTC	PNC	1	2019-01-20	10	120	7	0	0	0	3 Vials left
601	HCC	PCV	2018-02-07	PNC	MTC	1	2020-01-01	3	123	0	0	0	0	STOCK
601	HCC	PCV	2018-03-07	MTC	CWC	1	2020-01-01	30	93	25	0	0	0	5 Vials left
601	HCC	PCV	2018-03-07	CWC	MTC	1	2020-01-01	5	98	0	0	0	0	STOCK
601	HCC	PCV	2018-09-07	MTC	PNC	1	2020-01-01	15	83	11	0	0	0	4 VIALS LEFT
601	HCC	PCV	2018-09-07	PNC	MTC	1	2020-01-01	4	87	0	0	0	0	STOCK
601	HCC	PCV	2018-10-07	MTC	CWC	1	2020-01-01	15	72	14	0	0	0	1 Vial left
601	HCC	PCV	2018-10-07	CWC	MTC	1	2020-01-01	1	73	0	0	0	0	STOCK
601	HCC	PCV	13/7/18	MTC	PNC	1	2020-01-01	1	72	1	0	0	0	0 Vials left
601	HCC	PCV	13/7/18	PNC	MTC	1	2020-01-01	0	72	0	0	0	0	STOCK
601	HCC	PCV	16/7/18	MTC	PNC	1	2020-01-01	10	62	7	0	0	0	3 Vials left
601	HCC	PCV	16/7/18	PNC	MTC	1	2020-01-01	3	65	0	0	0	0	STOCK
601	HCC	PCV	16/7/18				2020-01-01		65					Balance brought forward
601	HCC	PCV	17/7/18	MTC	CWC	1	2020-01-01	25	40	22	0	0	0	3 Vials left
601	HCC	PCV	17/7/18	CWC	MTC	1	2020-01-01	3	43	0	0	0	0	STOCK
601	HCC	PCV	18/7/18	VDC	MTC	1	2020-01-01	100	143	0	0	0	0	STOCK
601	HCC	PCV	23/7/18	MTC	PNC	1	2020-01-01	10	133	7	0	0	0	3 Vials left
601	HCC	PCV	23/7/18	PNC	MTC	1	2020-01-01	3	136	0	0	0	0	STOCK
601	HCC	PCV	24/7/18	fridge	CWC	1	2020-01-01	35	101	32	0	0	0	STOCK
601	HCC	PCV	24/7/18	CWC	MTC	1	2020-01-01	3	104	0	0	0	0	STOCK
601	HCC	PCV	30/7/18	MTC	PNC	1	2020-01-01	10	94	6	0	0	0	4 VIALS LEFT
601	HCC	PCV	30/7/18	PNC	MTC	1	2019-01-20	4	98	0	0	0	0	STOCK
601	HCC	PCV	31/7/18	MTC	CWC	1	2020-01-01	20	78	4	0	0	0	16 VIALS LEFT
601	HCC	PCV	31/7/18	CWC	MTC	1	2019-01-20	16	94	0	0	0	0	STOCK
601	HCC	PCV	2018-06-08	MTC	PNC	1	2020-01-01	10	84	8	0	0	0	2 VIALS LEFT
601	HCC	PCV	2018-06-08	PNC	MTC	1	2020-01-01	2	86	0	0	0	0	STOCK LEVEL
601	HCC	PCV	7/8/18/	MTC	CWC	1	2019-01-20	2	52	33	0	0	0	1 Vial left
601	HCC	PCV	2018-07-08			1	2020-01-01	52	52					Balance brought forward
601	HCC	PCV	2018-07-08	CWC	MTC	1	2020-01-01	1	53	0	0	0	0	STOCK
601	HCC	PCV	13/8/18	MTC	PNC	1	2020-01-01	20	33	12	0	0	0	8 vials left
601	HCC	PCV	13/8/18	PNC	MTC	1	2020-01-01	8	41	0	0	0	0	STOCK
601	HCC	PCV	14/8/18	MTC	CWC	1	2020-01-01	21	20	17	0	0	0	4 VIALS LEFT
601	HCC	PCV	14/8/18	CWC	MTC	1	2020-01-01	4	24	0	0	0	0	STOCK
601	HCC	PCV	20/8/18	VDC	MTC	1	2020-01-01	176	200					STOCK
601	HCC	PCV	20/8/18	MTC	PNC	1	2020-01-01	10	190	8	0	0	0	2 VIALS LEFT
601	HCC	PCV	20/8/18	PNC	MTC	1	2020-01-01	2	192	0	0	0	0	STOCK
601	HCC	PCV	21/8/18	MTC	CWC	1	2020-01-01	20	172	20	0	0	0	All vials used
601	HCC	PCV	21/8/18	CWC	MTC	1	2020-01-01	0	172	0	0	0	0	STOCK
601	HCC	PCV	27/8/18	MTC	PNC	1	2020-01-01	10	162	8	0	0	0	2 VIALS LEFT
601	HCC	PCV	27/8/18	PNC	MTC	1	2020-01-01	2	164	0	0	0	0	STOCK
601	HCC	PCV	28/8/18	MTC	CWC	1	2020-01-01	30	134	28	0	0	0	2 VIALS LEFT
601	HCC	PCV	28/8/18	CWC	MTC	1	2020-01-01	2	136	0	0	0	0	STOCK
601	HCC	PCV	2018-03-09			1	2020-01-01		136					Balance brought forward
601	HCC	PCV	2018-03-09	MTC	PNC	1	2020-01-01	10	126	7	0	0	0	3 Vials left
601	HCC	PCV	2018-03-09	PNC	MTC	1	2020-01-01	3	129	0	0	0	0	STOCK
601	HCC	PCV	2018-04-09	MTC	CWC	1	2020-01-01	22	107	22	0	0	0	All vials used
601	HCC	PCV	2018-04-09	CWC	MTC	1	2020-01-01	0	107	0	0	0	0	STOCK
601	HCC	PCV	2018-10-09	MTC	PNC	1	2020-01-01	15	92	11	0	0	0	4 VIALS LEFT
601	HCC	PCV	2018-10-09	PNC	MTC	1	2020-01-01	4	96	0	0	0	0	STOCK
601	HCC	PCV	2018-11-09	MTC	CWC	1	2020-01-01	10	86	4	0	0	0	6 Vials left
601	HCC	PCV	2018-11-09	CWC	MTC	1	2020-01-01	6	92	0	0	0	0	STOCK
601	HCC	PCV	17/9/18	MTC	PNC	1	2020-01-01	15	77	11	0	0	0	4 VIALS LEFT
601	HCC	PCV	17/9/18	PNC	MTC	1	2020-01-01	4	81	0	0	0	0	STOCK
601	HCC	PCV	18/9/18	MTC	CWC	1	2020-01-01	25	56	23	0	0	0	2 VIALS LEFT
601	HCC	PCV	18/9/18	CWC	MTC	1	2020-01-01	2	58	0	0	0	0	STOCK
601	HCC	PCV	18/9/18					46	46					STOCK
601	HCC	PCV	24/9/18	PNC	Fridge	1	2020-01-01	10	36	4	0	0	0	6 Vials left
601	HCC	PCV	15/10/18			1	2020-01-01		150					Balance brought forward
601	HCC	PCV	15/10/18	PNC	MTC	1		5	155	0	0	0	0	STOCK
601	HCC	PCV	2018-06-10	MTC	CWC	1	2020-01-01	20	135	20	0	0	0	All vials used
601	HCC	PCV	16/10/18	CWC	MTC	1	2020-01-01	0	135	0	0	0	0	STOCK
601	HCC	PCV	22/10/18	MTC	PNC	1	2020-01-01	5	130	2	0	0	0	STOCK
601	HCC	PCV	22/10/18	PNC	MTC	1	2020-01-01	2	133	0	0	0	0	3 Vials left
601	HCC	PCV	23/10/18						133					STOCK TAKE
601	HCC	PCV	23/10/18	VDC	MTC	1	2020-01-01	87	200	0	0	0	0	STOCK
601	HCC	PCV	2018-04-12			1	2019-01-01		4					STOCK TAKE
601	HCC	PCV	2018-10-12	VDC	MTC	1		196	200					NEW STOCK
601	HCC	MR	18/9/18			1	2018-12-01	150	150					Balance brought forward
601	HCC	MR	19/9/18	MTC	MR/Campaign	1		60	90	14	0	0	0	4 VIALS LEFT
601	HCC	MR	19/9/18	mr campaign	MTC	1	2019-12-18	40	130	0	0	0	0	STOCK
601	HCC	MR	21/9/18	MTC	MR/Campaign	1	2018-12-01	10	120	3	0	0	0	7 DOSES WASTAGE
601	HCC	MR	21/9/18	mr campaign	MTC	1	2018-12-01	0	120	0	0	0	0	STOCK
601	HCC	MR	2018-01-10	VDC	MTC	1		180	300					NEW STOCK
601	HCC	MR	2018-02-10	MTC	MR/Campaign	1	2018-12-01	10	290	2	0	0	0	8 DOSES WASTAGE
601	HCC	MR	2018-01-10	mr campaign	MTC	1	2018-12-01	0	290	0	0	0	0	STOCK
601	HCC	MR	2018-02-10	MTC	CWC	1	2018-12-01	20	280	17	0	0	0	3 DOSES WASTAGE
601	HCC	MR	2018-02-10	CWC	MTC	1	2018-12-01	0	280	0	0	0	0	STOCK
601	HCC	MR	2018-09-10	MTC	CWC	1	2018-12-01	10	270	8	0	0	0	2 DOSES WASTAGE
601	HCC	MR	2018-09-10	CWC	MTC	1	2018-12-01	0	270	0	0	0	0	STOCK
601	HCC	MR	16/10/18	MTC	CWC	1	2018-12-01	10	260	3	0	0	0	7 DOSES WASTAGE
601	HCC	MR	16/10/18	CWC	MTC	1	2018-12-01	0	260	0	0	0	0	STOCK
601	HCC	MR	19/10/18	MTC	OPD	1	2018-12-01	10	250	1	0	0	0	9 DOSES WASTAGE
601	HCC	MR	2018-07-08			1	2018-12-01		260					Balance brought forward
601	HCC	MR	2018-07-08	CWC	MTC	1	DEC 20-18	0	260	0	0	0	0	STOCK
601	HCC	MR	14/8/18	MTC	CWC	1		10	250	2	0	0	0	8 DOSES WASTAGE
601	HCC	MR	14/8/18	CWC	MTC	1		0	250	0	0	0	0	STOCK
601	HCC	MR	20/8/18	VDC	MTC	1	2018-12-01	0	250					STOCK
601	HCC	MR	21/8/18	CWC	MTC	1	2018-12-01	10	240	4	0	0	0	6 DOSES WASTAGE
601	HCC	MR	21/8/18	CWC	MTC	1	2018-12-01	0	240	0	0	0	0	STOCK
601	HCC	MR	28/8/18	MTC	CWC	1	2018-12-01	10	230	9	0	0	0	1 DOSE WASTE
601	HCC	MR	28/8/18	MTC	CWC	1		0	230	0	0	0	0	STOCK
601	HCC	MR	2018-04-09	MTC	CWC	1		10	220	7	0	0	0	3 D0SES
601	HCC	MR	2018-04-09	CWC	MTC	1		0	220	0	0	0	0	STOCK
601	HCC	MR	2018-11-09	MTC	CWC	1	2018-12-01	10	210	7	0	0	0	3 DOSES WASTAGE
601	HCC	MR	2018-11-09	CWC	MTC	1	2018-12-01	0	210	0	0	0	0	STOCK
601	HCC	MR	18/9/18	MTC	CWC	1	2018-12-01	50	160	41	0	0	0	9 DOSES WASTAGE
601	HCC	MR	18/9/18	CWC	MTC	1		0	160	0	0	0	0	STOCK
601	HCC	MR	19/10/18			1	2018-12-01		250					Balance brought forward
601	HCC	MR	19/10/18	OPD/MR 2	MTC	1	2018-12-01	0	250	0	0	0	0	STOCK
601	HCC	MR	23/10/18						220					STOCK TAKE
601	HCC	MR	23/10/18	VDC	MTC	1		280	500	0	0	0	0	STOCK
601	HCC	MR	2018-04-12			1	2018-12-01		16					STOKE TAKE.
706	Malaita	BCG	18/01/17			1	30/10/17		261					Stock check/ doses received are written in vials not doses.
706	Malaita	BCG	31/1/17		Talakali	1	30/10/17	7	254
706	Malaita	BCG	2017-08-02		Fauabu	1	30/10/17	10	244
706	Malaita	BCG	2017-09-02		sinamauri	1	30/10/17	10	234
706	Malaita	BCG	2017-10-02		lesiala	1	30/10/17	6	228
706	Malaita	BCG	15/2/17		busurata	1	30/10/17	1	227					15 vials not recorded
706	Malaita	BCG	16/2/17			1	30/10/17		212					stock check
706	Malaita	BCG	17/2/17		Gwaurata	1	30/10/17	3	209
706	Malaita	BCG	17/2/17		Dala	1	30/10/17	5	204
706	Malaita	BCG	20/2/17		Auki	1	2019-10-17	2	202
706	Malaita	BCG	20/2/17	NMS		1	2019-09-17	30	232
706	Malaita	BCG	23/2/17		LWD	1	2019-09-17	10	222
706	Malaita	BCG	24/2/17		MOI	1	2019-09-17	1	221
706	Malaita	BCG	24/2/17		MAOA	1	2019-09-17	6	215
706	Malaita	BCG	24/2/17		Arao	1	2019-09-17	1	214
706	Malaita	BCG	2017-02-03		busurata	1	2019-09-17	1	213
706	Malaita	BCG	2017-10-03		MAOA	1	2019-09-17	6	207
706	Malaita	BCG	14/3/17		Fauabu	1	2019-09-17	3	204
706	Malaita	BCG	16/3/17			1	2019-09-17		204					stock take ..vaccines are recorded according to vials not doses
706	Malaita	BCG	22/3/17		Gwaifai	1	2019-09-17	1	203
706	Malaita	BCG	27/3/17		LWD	1	2019-09-17	50	153
706	Malaita	BCG	27/3/17		Busufosao	1	2019-09-17	3	150
706	Malaita	BCG	30/3/17		Gwaurata	1	2019-09-17	3	147
706	Malaita	BCG	30/3/17		busurata	1	2019-09-17	1	146
706	Malaita	BCG	2017-03-04	NMS		1	2019-09-17	85	231
706	Malaita	BCG	2017-06-04		Arao	1	2019-09-17	5	226
706	Malaita	BCG	2017-10-04		Auki	1	2019-09-17	1	225
706	Malaita	BCG	2017-10-04		Auki	1	2019-09-17	5	220
706	Malaita	BCG	12/4/17/		MAOA	1	2019-09-17	6	214
706	Malaita	BCG	2017-12-04		KIU	1	2019-09-17	10	204
706	Malaita	BCG	13/4/17		Gwaurata	1	2019-09-17	3	201
706	Malaita	BCG	20/4/17		Auki	1	2019-09-17	20	181
706	Malaita	BCG	21/4/17		lesiala	1	2019-09-17	6	175
706	Malaita	BCG	25/4/17		Fauabu	1	2019-09-17	10	165
706	Malaita	BCG	30/4/17		moi	1	2019-09-17	10	155
706	Malaita	BCG	2017-02-05		busurata	1	2019-09-17	3	152
706	Malaita	BCG	2017-04-05		Arao	1	2019-09-17	5	147
706	Malaita	BCG	2017-11-05		Rafufu	1	2019-09-17	20	127
706	Malaita	BCG	15/5/17			1	2019-09-17		127					Stock check/ vaccines are recorded in vials and not in doses.
706	Malaita	BCG	22/5/17		Maoa	1	2019-09-17	10	117
706	Malaita	BCG	23/5/17	NMS		1	2019-09-17	150	267
706	Malaita	BCG	30/5/17		busurata	1	30/10/17	1	266
706	Malaita	BCG	2017-02-06		sinamauri	1	30/10/17	6	260
706	Malaita	BCG	2017-07-06		Auki	1	30/10/17	17	243
706	Malaita	BCG	2017-07-06			1	2019-10-17		243					stock check/ vaccines are written in vials not doses
706	Malaita	BCG	2017-09-06		Gwarata	1	2019-10-17	3	240
706	Malaita	BCG	13/7/17			1			173					stock take
706	Malaita	BCG	13/7/17		Dala	1	2019-10-17	5	167
706	Malaita	BCG	14/7/17		Gwarata	1	2019-10-17	2	166
706	Malaita	BCG	24/7/17		sinamauri	1	2019-10-17	6	160
706	Malaita	BCG	24/7/17		LWD	1	2019-10-17	10	150
706	Malaita	BCG	26/7/17		Gwaunaoa	1	2019-10-17	1	149
706	Malaita	BCG	27/7/17		arao	1	2019-10-17	7	147
706	Malaita	BCG	28/7/17	NMS		1	30/10.17	190	332
706	Malaita	BCG	2017-01-08		oneone	1	30/10/17	1	331
706	Malaita	BCG	2017-10-08		Auki	1	30/10/17	4	327
706	Malaita	BCG	2017-11-08		maoa	1	30/10/17	2	325
706	Malaita	BCG	2017-11-08		Rafufu	1	30/10/17	10	315
706	Malaita	BCG	14/8/17		busurata	1	30/10/17	2	313
706	Malaita	BCG	17/8/17		dala	1	2019-10-17	10	303
706	Malaita	BCG	18/8/17		Talakali	1	2019-10-17	10	293
706	Malaita	BCG	21/8/17		LWD	1	2019-10-17	1	243
706	Malaita	BCG	30/8/17		Gwaunaoa	1	2019-10-17	1	242
706	Malaita	BCG	18/9/17						207					stock take/ vaccines are recorded in viles not doses.
706	Malaita	BCG	22/9/17	NMS		1	30/2/19	100	307
706	Malaita	BCG	25/9/17		sinamauri	1	30/2/19	2	305
706	Malaita	BCG	26/9/17		busurata	1	30/2/19	4	301
706	Malaita	BCG	26/9/17		Fauabu	1	30/2/19	5	296
706	Malaita	BCG	26/9/17		moi	1	30/2/19	10	286					vacines are recorded according to viles not doses.
706	Malaita	HEP B	27/3/17		Busufosao	1	20/10/17	12	244
706	Malaita	HEP B	30/3/17		Gwaurata	1	20/10/17	5	239
706	Malaita	HEP B	2017-03-04	NMS		1	20/10/17	100	339					vaccines are recorded according to villes
706	Malaita	HEP B	2017-06-04		Arao	1	20/10/17	5	334
706	Malaita	HEP B	2017-07-04		sinamauri	1	20/10/17	20	314
706	Malaita	HEP B	20/4/17		Dala	1	20/10/17	20	294
706	Malaita	HEP B	25/4/17		Fauabu	1	20/10/17	4	290
706	Malaita	HEP B	28/4/17		MAOA	1		20	270
706	Malaita	HEP B	30/4/17		moi	1	20/10/17	10	260
706	Malaita	HEP B	2017-02-05		busurata	1	20/10/17	3	257
706	Malaita	HEP B	15/5/17			1	20/10/17		257					stock take/ vaccines are recorded in viles and not doses.
706	Malaita	HEP B	19/5/17		lesiala	1	20/10/17	10	247
706	Malaita	HEP B	23/5/17	NMS		1	30/10/17	100	347
706	Malaita	HEP B	30/5/17		busurata	1	30/10/17	1	346
706	Malaita	HEP B	2017-07-06			1	2019-10-17		346					stock update/vaccines recorded in viles and not in doses.
706	Malaita	HEP B	14/6/17		Hauhui	1	2019-10-17	10	336
706	Malaita	HEP B	13/7/17				2019-10-17		226					stock take/ vaccines recorded in viles
706	Malaita	HEP B	13/7/17		Dala	1	2019-10-17	10	216
706	Malaita	HEP B	14/7/17		Gwaurata	1	2019-10-17	5	211
706	Malaita	HEP B	21/7/17		Hauhui	1	2019-10-17	17	194
706	Malaita	HEP B	24/7/17		sinamauri	1	2019-10-17	26	168
706	Malaita	HEP B	27/7/17		arao	1	2019-10-17	10	158
706	Malaita	HEP B	14/8/17		busurata	1	2019-10-17	2	156
706	Malaita	HEP B	21/8/17		Fauabu	1	2019-10-17	10	146
706	Malaita	HEP B	18/9/17			1	2019-10-17		116					stock take . Vaccines are recorded according to viles.
706	Malaita	HEP B	22/9/17	NMS		1	2019-01-05	450	566
706	Malaita	HEP B	25/9/17		sinamauri	1	2019-01-05	6	560
706	Malaita	HEP B	26/9/17		busurata	1	2019-10-17	3	557
706	Malaita	HEP B	26/9/17		Fauabu	1	2017-10-20	20	537
706	Malaita	HEPB_10	18/1/17			1	30/5/17		73					Vaccines recorded according to viles and not doses.
706	Malaita	HEP B_10	16/2/17			1	30/5/17		73					STOCK CHECK
706	Malaita	HEP B _10	20/2/17	NMS		1	2018-12-07	13	86
706	Malaita	HEP B_10	23/2/17		LWD	1	2018-12-17	10	76
706	Malaita	HEP B_10	24/2/17		MOI	1	2018-12-17	1	75
706	Malaita	HEP B _10	24/2/17		Arao	1	2018-12-17	1	74
706	Malaita	HEP B_10	2017-02-03		busurata	1	2018-12-07	1	73
706	Malaita	HEP B_10	14/3/17		Fauabu	1	2017-12-07	2	71
706	Malaita	HEP B_10	16/3/17			1	2018-12-07		71					STOCK TAKE/ Vaccines recorded in viles and not doses.
706	Malaita	HEP B_10	27/3/17		Busufosao	1	2018-12-07	2	69
706	Malaita	HEP B_10	2017-03-04	NMS		1	2018-12-07	15	84
706	Malaita	HEP B_10	20/4/17		LWD	1	2018-12-07	10	74
706	Malaita	HEP B_10	25/4/17		Fauabu	1	2018-12-07	2	72
706	Malaita	HEP B_10	15/5/17		LWD	1	2018-12-07	9	63
706	Malaita	HEP B_10	15/5/17						33				30 VIALS	30 Vials expired 01/05/2017
706	Malaita	HEP B_10	15/5/17			1	2018-12-07		33					STOCK TAKE
706	Malaita	HEP B_10	23/5/17	NMS		1	30/8/17	80	113
706	Malaita	HEP B_10	2017-07-06		AUKI	1	2018-12-07	10	103
706	Malaita	HEP B_10	2017-07-06			1	2018-12-07		103					Stock update/vaccines are recorded according to viales
706	Malaita	HEP B_10	13/7/17			1	2018-12-07		97					STOCK TAKE
706	Malaita	HEP B_10	21/7/17		Hauhui	1	2018-12-07	2	95
706	Malaita	HEP B_10	24/7/17		sinamauri	1	12/718	3	92
706	Malaita	HEP B_10	24/7/17		LWD	1	2018-12-07	50	42
706	Malaita	HEP B_10	27/7/17		Arao	1	2018-12-07	1	41
706	Malaita	HEP B_10	2017-10-07		Auki	1	2018-12-07	3	38
706	Malaita	HEP B_10	2017-11-08		MAOA	1	2018-12-07	3	35
706	Malaita	HEP B_10	21/8/17		Fauabu	1	2018-12-07	4	31
706	Malaita	HEP B_10	18/9/17			1	2018-12-07		24					STOCK TAKE/Vaccines are recorded according to vials not doses.
706	Malaita	HEP B_10	22/9/17	NMS		1	2018-09-07	60
706	Malaita	HEP B_10	25/9/17		sinamauri	1	2018-12-07	2	82
706	Malaita	HEP B_10	26/9/17		MOI	1	2018-12-07	2	80
706	Malaita	PCV	18/1/17			1	2019-04-18		40					STOCK TAKE
706	Malaita	PCV	26/1/17		AUKI	1	2019-04-18	40	0
706	Malaita	PCV	26/2/17						0					STOCK CHECK
706	Malaita	PCV	20/2/17			1		1780	1780
706	Malaita	PCV	20/2/17		AUKI	1	2019-11-18	10	1770
706	Malaita	PCV	23/2/17		AUKI	1	2019-11-18	100	1670
706	Malaita	PCV	24/2/17		Rafufu	1	2019-11-18	50	1620
706	Malaita	PCV	24/2/17		lesiala	1	2019-11-18	50	1570
706	Malaita	PCV	24/2/17		MOI	1	2019-11-18	10	1560
706	Malaita	PCV	24/2/17		Talakali	1	2019-11-18	15	1545
706	Malaita	PCV	24/2/17		arao	1	2019-11-18	5	1540
706	Malaita	PCV	2017-01-03		sinamauri	1	2019-11-18	60	1480
706	Malaita	PCV	2017-02-03		Fauabu	1	2019-11-18	5	1475
706	Malaita	PCV	2017-03-03		busurata	1	2019-11-18	10	1465
706	Malaita	PCV	2017-03-03		Dala	1	2019-11-18	50	1415
706	Malaita	PCV	2017-08-03		Gwaunaoa	1	2019-11-18	90	1325
706	Malaita	PCV	16/3/17			1	2019-11-18		1245					Stock take
706	Malaita	PCV	16/3/17		Talakali	1	2019-11-18	50	1195
706	Malaita	PCV	22/3/17		Rafufu	1	2019-11-18	20	1175
706	Malaita	PCV	23/3/17		maoa	1	2019-11-18	30	1145
706	Malaita	PCV	23/3/17		AUKI	1	2019-11-18	50	1095
706	Malaita	PCV	24/3/17		lesiala	1	2019-11-18	25	1070
706	Malaita	PCV	27/3/17		Busufosao	1	2019-11-18	36	1034
706	Malaita	PCV	28/3/17		Fauabu	1	2019-11-18	50	984
706	Malaita	PCV	2017-03-04	NMS		1	2019-11-18	550	1534
706	Malaita	PCV	2017-06-04		Arao	1	2019-11-18	10	1534
706	Malaita	PCV	2017-07-04		sinamauri	1	2019-11-18	40	1484
706	Malaita	PCV	2017-07-04		Auki	1	2019-11-18	10	1474
706	Malaita	PCV	2017-10-04		AUKI	1	2019-11-18	50	1424
706	Malaita	PCV	2017-12-04		MAOA	1	2019-11-18	24	1400
706	Malaita	PCV	2017-02-04		KIU	1	2019-11-18	50	1350
706	Malaita	PCV	2017-03-04		Gwaurata	1	2019-11-18	30	1320
706	Malaita	PCV	20/4/17		Dala	1	2019-11-18	80	1240
706	Malaita	PCV	20/4/17		AUKI	1	2019-11-18	110	1130
706	Malaita	PCV	28/4/17		MAOA	1	2019-11-18	30	1100
706	Malaita	PCV	30/4/17		MOI	1	2019-11-18	50	1050
706	Malaita	PCV	2017-02-05		busurata	1	2019-11-18	150	877
706	Malaita	PCV	15/5/17			1	2019-11-18		877					STOCK TAKE
706	Malaita	PCV	19/5/17		lesiala	1	2019-11-18	30	847
706	Malaita	PCV	22/5/17		MAOA	1	2019-11-18	24	823
706	Malaita	PCV	23/5/17	NMS		1	2019-11-18	950	1773
706	Malaita	PCV	24/5/17		sinamauri	1	2019-11-18	30	1743
706	Malaita	PCV	25/5/17		Gwaifai	1	2019-11-18	30	1713
706	Malaita	PCV	25/5/17		AUKI	1	2019-11-18	100	1613
706	Malaita	PCV	30/5/17		basurata	1	2019-11-18	10	1603
706	Malaita	PCV	2017-01-06		Rafufu	1	2019-11-18	20	1583
706	Malaita	PCV	2017-02-06		Fauabu	1	2019-11-18	21	1562
706	Malaita	PCV	2017-07-06			1	2019-11-18		1562					stock update
706	Malaita	PCV	2017-09-06		Gwarata	1	2019-11-18	30	1532
706	Malaita	PCV	14/6/17		Hauhui	1	2019-11-18	46	1436
706	Malaita	PCV	13/7/17			1	2019-11-18		709					stock take
706	Malaita	PCV	13/7/17		Dala	1	2019-11-18	50	659
706	Malaita	PCV	14/7/17		Gwarata	1	2019-11-18	25	634
706	Malaita	PCV	14/7/17		lesiala	1	2019-11-18	50	584
706	Malaita	PCV	17/7/17		Fauabu	1	2019-11-18	10	574
706	Malaita	PCV	21/7/17		Hauhui	1	2019-11-18	4	570
706	Malaita	PCV	24/7/17		sinamauri	1	2019-11-18	50	520
706	Malaita	PCV	27/7/17		arao	1	30/11/18	12	502
706	Malaita	PCV	28/7/17	NMS		1	30/11/18	1300	1802
706	Malaita	PCV	2017-01-08		oneone	1	30/11/18	10	1792
706	Malaita	PCV	2017-02-08		pelau	1	30/11/18	120	1672
706	Malaita	PCV	2017-03-08		AUKI	1	30/11/18	44	1628
706	Malaita	PCV	2017-10-08		oneone	1	30/11/18	6	1622
706	Malaita	PCV	2017-11-08		maoa	1	30/11/18	50	1572
706	Malaita	PCV	2018-11-08		Rafufu	1	30/11/18	33	1539
706	Malaita	PCV	14/8/17		busurata	1	30/11/18	15	1524
706	Malaita	PCV	17/8/17		Dala	1	30/11/18	50	1474
706	Malaita	PCV	18/8/17		Talakali	1	30/11/18	50	1424
706	Malaita	PCV	21/8/17		Fauabu	1	30/11/18	30	1394
706	Malaita	PCV	24/8/17		oneone	1	30/11/18	5	1389
706	Malaita	PCV	30/8/17		Arao	1	30/11/18	180	1209
706	Malaita	PCV	30/11/17		Gwaunaoa	1	30/11/18	20	1189
706	Malaita	PCV	2017-08-09		CWD	1	2019-11-18	1	1188
706	Malaita	PCV	18/9/17			1	2019-11-18		1058					stock take
706	Malaita	PCV	19/9/17		KIU	1	2019-11-18	50	1008
706	Malaita	PCV	20/9/17		Arao	1	2019-11-18	15	993
706	Malaita	PCV	22/9/17		Hauhui	1	2019-11-18	50	943
706	Malaita	PCV	22/9/17			1	2019-11-18		943
706	Malaita	PCV	22/9/17	NMS		1	2019-04-19	750	1693
706	Malaita	PCV	25/9/17		sinamauri	1	2019-04-19	30	1663
706	Malaita	PCV	26/9/17		busurata	1	2019-04-19	15	1678
706	Malaita	PCV	26/9/17		Fauabu	1	2019-04-19	50	1598
706	Malaita	PCV	26/9/17		Moi	1	2019-04-19	80	1518
706	Malaita	PCV	26/9/17		Talakali	1	2019-04-19	50	1468
706	Malaita	PCV	27/9/17		Gwaunaoa	1	2019-04-19	13	1455
706	Malaita	PCV	29/9/17		Dala	1	2019-04-19	50	1405
706	Malaita	MR	2017-08-01			1	2019-04-19		273					stock take
706	Malaita	MR	26/1/17		AUKI	1	2019-04-19	20	253
706	Malaita	MR	2017-03-02		Gwaunaoa	1	30/12/17	10	243
706	Malaita	MR	2017-08-02		Fauabu	1	30/12/17	20	223
706	Malaita	MR	2017-09-02		sinamauri	1	30/12/17	5	218
706	Malaita	MR	2017-10-02		lesiala	1	30/12/17	7	211
706	Malaita	MR	15/2/17		busurata	1	30/12/17	1	210
706	Malaita	MR	16/2/17			1	30/12/17		226					stock check
706	Malaita	MR	17/2/17		Gwarata	1	30/12/17	5	221
706	Malaita	MR	17/2/17		Dala	1	30/12/17	5	216
706	Malaita	MR	20/2/17		AUKI	1	30/12/17	2	214
706	Malaita	MR	20/2/17	NMS		1	30/12/17	16	230
706	Malaita	MR	24/2/17		moi	1	30/12/17	5	225
706	Malaita	MR	24/2/17		maoa	1	30/12/17	4	221
706	Malaita	MR	24/2/17		Talakali	1	30/12/17	11	210
706	Malaita	MR	24/2/17		arao	1	2019-12-17	4	205
706	Malaita	MR	2017-01-03		sinamauri	1	2019-12-17	4	201
706	Malaita	MR	2017-01-03		Fauabu	1	2019-12-17	10	191
706	Malaita	MR	2017-02-03		busurata	1	2019-12-17	1	190
706	Malaita	MR	2017-10-03		maoa	1	2019-12-17	5	185
706	Malaita	MR	16/3/17			1	2019-12-17		185					stock take
706	Malaita	MR	22/3/17		Gwaifai	1	2019-12-17	1	184
706	Malaita	MR	24/3/17		lesiala	1	2019-12-17	10	174
706	Malaita	MR	27/3/17		Busufosao	1	2019-12-17	2	172
706	Malaita	MR	30/3/17		Gwarata	1	2019-12-17	3	169
706	Malaita	MR	2017-03-04	NMS		1	2019-12-17	100	269
706	Malaita	MR	2017-06-04		Arao	1	2019-12-17	5	264
706	Malaita	MR	2017-07-04		sinamauri	1	2019-12-17	3	261
706	Malaita	MR	2017-10-04		AUKI	1	2019-12-17	10	251
706	Malaita	MR	2017-12-04		maoa	1	2019-12-17	10	241
706	Malaita	MR	13/4/17		Gwarata	1	2019-12-17	3	219
706	Malaita	MR	20/4/17		Dala	1	2019-12-17	19	219
706	Malaita	MR	25/4/17		Fauabu	1	2019-12-17	5	214
706	Malaita	MR	30/4/17		moi	1	2019-12-17	10	204
706	Malaita	MR	2017-07-05		busurata	1	2019-12-17	1	203
706	Malaita	MR	2017-11-05		Rafufu	1	2019-12-17	10	193
706	Malaita	MR	2017-12-05		Auki	1	2019-12-17	25	168
706	Malaita	MR	15/5/17			1	2019-12-17	3	238					stock take
706	Malaita	MR	22/5/17		MAOA	1	2019-12-17	6	162
706	Malaita	MR	23/5/17	NMS		1	2019-05-18	120	282
706	Malaita	MR	25/5/17		Auki	1	2019-12-17	14	268
706	Malaita	MR	30/5/17		busurata	1	2019-12-17	2	266
706	Malaita	MR	2017-02-06		sinamauri	1	2019-12-17	12	254
706	Malaita	MR	2017-07-06			1	2019-12-17		134					stock update
706	Malaita	MR				1	2019-05-18	120	154
706	Malaita	MR	2017-09-06		Gwarata	1	2019-12-17	3	251
706	Malaita	MR	14/6/17		Hauhui	1	2019-12-17	1	250
706	Malaita	MR	13/7/17			1	2019-12-17		201					stock take
706	Malaita	MR	14/7/17		Gwarata	1	2019-12-17	3	198
706	Malaita	MR	21/7/17		Hauhui	1	2019-12-17	8	190
706	Malaita	MR	24/7/17		sinamauri	1	2019-12-17	6	184
706	Malaita	MR	27/7/17		arao	1	2019-12-17	6	178
706	Malaita	MR	28/7/17	NMS		1	30/5/18	100	278
706	Malaita	MR	2017-01-08		oneone	1	2019-12-17	1	277
706	Malaita	MR	2017-10-08		AUKI	1	2019-12-17	6	271
706	Malaita	MR	2017-10-08		oneone	1	2019-12-17	1	270
706	Malaita	MR	2017-11-08		maoa	1	2019-12-17	4	266
706	Malaita	MR	2017-11-08		Rafufu	1	2019-12-17	7	259
706	Malaita	MR	14/8/17		busurata	1	2019-12-17	2	257
706	Malaita	MR	17/8/17		Dala	1	2019-12-17	10	247
706	Malaita	MR	18/8/17		Talakali	1	2019-12-17	10	237
706	Malaita	MR	21/8/17		Fauabu	1	2019-12-17	10	227
706	Malaita	MR	24/8/17		oneone	1	2019-12-17	1	226
706	Malaita	MR	30/8/17		AUKI	1	2019-12-17	30	196
706	Malaita	MR	30/8/17		Gwaunaoa	1	2019-12-17	2	194
706	Malaita	MR	2017-08-09		lesiala	1	2019-12-17	10	184
706	Malaita	MR	18/9/17			1	2019-12-17		164					stock take
706	Malaita	MR	20/9/17		arao	1	2019-12-17	10	154
706	Malaita	MR	19/9/17		KIU	1	2019-12-17	20	134
706	Malaita	MR	22/9/17			1	2019-12-17		126					stock take
706	Malaita	MR	22/9/17	NMS		1	2019-05-18	150	276
706	Malaita	MR	25/9/17		sinamauri	1	2019-05-18	4	272
706	Malaita	MR	26/9/17		busurata	1	2019-05-18	3	269
706	Malaita	MR	26/9/17		Fauabu	1	2019-05-18	10	259
706	Malaita	MR	26/9/17		moi	1	2019-05-18	5	254
706	Malaita	penta	2017-08-01			1	2019-09-17		1125					stock take
706	Malaita	penta	21/1/17		AUKI	1	2019-09-17	100	1025
706	Malaita	penta	26/1/17		sinamauri	1	2019-09-17	50	975
706	Malaita	penta	27/1/17		lesiala	1	2019-09-17	30	945
706	Malaita	penta	2017-03-02		Gwaunaoa	1	2019-09-17	50	895
706	Malaita	penta			Talakali	1	2019-09-17	50	845
706	Malaita	penta	2017-09-02		sinamauri	1	2019-09-17	20	825
706	Malaita	penta	2017-05-02		busurata	1	2019-09-17	15	810
706	Malaita	penta	2017-06-02			1	2019-09-17		765					stock take
706	Malaita	penta	2017-07-02		Gwarata	1	2019-09-17	15	750
706	Malaita	penta	2017-07-02		Dala	1	2019-09-17	20	730
706	Malaita	penta	20/2/17	NMS		1	15/4/18	660	1390
706	Malaita	penta	23/2/17		AUKI	1	15/4/18	100	1290
706	Malaita	penta	24/2/17		moi	1	15/4/18	10	1280
706	Malaita	penta	24/2/17		maoa	1	15/4/18	90	1190
706	Malaita	penta	24/2/17		Talakali	1	15/4/18	15	1175
706	Malaita	penta	24/2/17		arao	1	15/4/18	30	1145
706	Malaita	penta	2017-01-03		sinamauri	1	15/4/18	20	1125
706	Malaita	penta	2017-01-03		Fauabu	1	15/4/18	10	1115
706	Malaita	penta	2017-02-03		busurata	1	15/4/18	15	1100
	Malaita	penta	2017-03-03		Dala	1	15/4/18	50	1050
706	Malaita	penta	2017-10-03		lesiala	1	15/4/18	50	1000
706	Malaita	penta	14/3/17		Fauabu	1	15/4/18	50	950
706	Malaita	penta	16/3/17			1	15/4/18	670
706	Malaita	penta				1	2019-09-17	281
706	Malaita	penta	16/3/17		Talakali	1	2019-09-17	50	901
706	Malaita	penta	22/3/17		Gwaifai	1	2019-09-17	15	886
706	Malaita	penta	22/3/17		Rafufu	1	2019-09-17	50	836
706	Malaita	penta	23/3/17		AUKI	1	2019-09-17	50	786
706	Malaita	penta	24/3/17		lesiala	1	2019-09-17	10	776
706	Malaita	penta	27/3/17		Busufosao	1	2019-09-17	36	740
706	Malaita	penta			busurata	1	2019-09-17	15	725
706	Malaita	penta	30/3/17		AUKI	1	2019-09-17	106	619
706	Malaita	penta	2017-03-04	NMS		1	2019-09-17	850	1469
706	Malaita	penta	2017-06-04		arao	1	2019-09-17	15	1454
706	Malaita	penta	2017-07-04		sinamauri	1	2019-09-17	40	1414
706	Malaita	penta	2017-10-04		AUKI	1	2019-09-17	40	1374
706	Malaita	penta	2017-12-04		maoa	1	2019-09-17	40	1334
706	Malaita	penta	13/4/17		Gwarata	1	2019-09-17	30	1304
706	Malaita	penta	20/4/17		Dala	1	2019-09-17	80	1224
706	Malaita	penta	20/4/17		AUKI	1	2019-09-17	110	1114
706	Malaita	penta	25/4/17		Fauabu	1	2019-09-17	50	1064
706	Malaita	penta	30/4/17		moi	1	2019-09-17	50	1014
706	Malaita	penta	2017-02-05		busurata	1	2019-09-17	10	1004
706	Malaita	penta	2017-04-05		Arao	1	2019-09-17	20	984
706	Malaita	penta	2017-12-05		AUKI	1	2019-09-17	201	783
706	Malaita	penta	15/5/17			1	2019-09-17		783					stock take
706	Malaita	penta	22/5/17		maoa	1	2019-09-17	8	775
706	Malaita	penta	23/5/17	NMS		1	2019-09-17	900	1675
706	Malaita	penta	24/5/17		sinamauri	1	2019-09-17	30	1645
706	Malaita	penta	25/5/17		Gwaifai	1	2019-09-17	30	1615
706	Malaita	penta	25/5/17		AUKI	1	2019-09-17	100	1515
706	Malaita	penta	30/5/17		busurata	1	2019-04-18	10	1505
706	Malaita	penta	2017-01-06		Rafufu	1	2019-04-18	20	1485
706	Malaita	penta	2017-07-06		AUKI	1	2019-04-18	40	1445
706	Malaita	penta	2017-07-06			1	2019-09-11		500					stock update
706	Malaita	penta	7/6/2017+B1172:D1193			1	2019-05-18	300	800
706	Malaita	penta	2017-07-06			1	2019-04-18	645	1445
706	Malaita	penta	2017-09-06		Gwarata	1	2019-04-18	30	1415
706	Malaita	penta	14/6/17		lesiala	1	2019-04-18	40	1375
706	Malaita	penta	14/6/17		Hauhui	1	2019-04-18	43	1332
706	Malaita	penta	13/7/17			1	2019-04-18		0					stock take
706	Malaita	penta	13/7/17			1	2019-04-18		500
706	Malaita	penta	13/7/17			1	2019-04-18		207
706	Malaita	penta	13/7/17			1	2019-04-18		701
706	Malaita	penta	13/7/17		Dala	1	2019-04-18	50	651
706	Malaita	penta	14/7/17		gwarata	1	2019-04-18	25	626
706	Malaita	penta	24/7/17		sinamauri	1	2019-05-18	78	548
706	Malaita	penta	27/7/17		arao	1	2019-05-18	15	533
706	Malaita	penta	28/7/17	NMS		1	2019-11-19	1400	1933
706	Malaita	penta	2017-01-08		oneone	1	2019-05-18	10	1923
706	Malaita	penta	2017-03-08		pelau	1	2019-05-18	120	1803
706	Malaita	penta	2017-10-08		AUKI	1	2019-05-18	111	1692
706	Malaita	penta	2017-10-08		oneone	1	2019-05-18	6	1686
706	Malaita	penta	2017-11-08		maoa	1	2019-09-11	50	1636
706	Malaita	penta	2017-11-08		Rafufu	1	2019-09-11	55	1581
706	Malaita	penta	14/8/17		busurata	1	2019-09-11	15	1566
706	Malaita	penta	17/8/17		Dala	1	2019-09-11	15	1551
706	Malaita	penta	18/8/17		Talakali	1	2019-09-11	50	1501
706	Malaita	penta	21/8/17		Fauabu	1	2019-09-11	30	1471
706	Malaita	penta	24/8/17		oneone	1	2019-09-11	5	1466
706	Malaita	penta	30/8/17		AUKI	1	2019-09-11	180	1286
706	Malaita	penta	30/8/17		Gwaunaoa	1	2019-09-11	20	1266
706	Malaita	penta	2017-08-09		CWD	1	2019-09-11	1	1265
706	Malaita	penta	2017-08-09		lesiala	1	2019-09-11	50	1215
706	Malaita	penta	18/8/17			1	2019-09-11		1111					stock take
706	Malaita	BCG	2018-10-01			1	2019-02-19		150					Stock update/ vaccines recorded in vials/not doses.
706	Malaita	BCG	18/01/18		KIU	1	2019-02-19	4	146
706	Malaita	BCG	23/1/18		busurata	1	2019-02-19	2	144
706	Malaita	BCG	26/1/18		lesiala	1	2019-02-19	6	138
706	Malaita	BCG	26/1/18		a'arai	1	2019-02-19	12	126
706	Malaita	BCG	26/1/18		Talakali	1	2019-02-19	4	122
706	Malaita	BCG	2018-01-02		AUKI	1	2019-02-19	10	112
706	Malaita	BCG	2018-02-02		Fauabu	1	2019-02-19	10	102
706	Malaita	BCG	2018-07-02		maoa	1	2019-02-19	10	92
706	Malaita	BCG	2018-08-02		arao	1	2019-02-19	1	91
706	Malaita	BCG	2018-08-02				2019-02-19		91					stock update
706	Malaita	BCG	14/2/18		sikaiana	1	2019-02-19	10	81
706	Malaita	BCG	20/2/18		Dala	1	2019-02-19	5	76
706	Malaita	BCG	23/2/18		AUKI	1	2019-02-19	8	68
706	Malaita	BCG	23/2/18		lesiala	1	2019-02-19	5	63
706	Malaita	BCG	23/2/18		oneone	1	2019-02-19	5	58
706	Malaita	BCG	23/2/18		Fauabu	1	2019-02-19	5	53
706	Malaita	BCG	23/2/18		busurata	1	2019-02-19	1	52
706	Malaita	BCG	23/2/18		Fauabu	1	2019-02-19	4	48
706	Malaita	BCG	2018-04-03		maoa	1	2019-02-19	8	40
706	Malaita	BCG	2018-05-03		sinamauri	1	2019-02-19	3	37
706	Malaita	BCG	2018-05-03			1	2019-02-19		2					stock update
706	Malaita	BCG	2018-07-03		pelau		2019-02-19	2	0
706	Malaita	BCG	16/3/18	NMS		1	2019-02-19		284
706	Malaita	BCG	21/3/18		maoa	1	2019-02-19	6	278
706	Malaita	BCG	23/3/18		Hauhui	1	2019-02-19	4	274
706	Malaita	BCG	26/3/18		lwd	1	2019-02-19	50	224
706	Malaita	BCG	26/3/18		sinamauri	1	2019-02-19	6	218
706	Malaita	BCG	27/3/18		Gwaunaoa	1	2019-02-19	1	217
706	Malaita	BCG	27/3/18		busurata	1	2019-02-19	2	215
706	Malaita	BCG	28/3/18		Gwaifai	1	2019-02-19	3	212
706	Malaita	BCG	28/3/18		LWD	1	2019-02-19	7	205
706	Malaita	BCG	2018-03-04		Fauabu	1	2019-02-19	6	199
706	Malaita	BCG	2018-07-04				2019-02-19		195					stock update
706	Malaita	BCG	2018-07-04		fauabu	1	2019-02-19	10	185
706	Malaita	BCG	18/4/18		Gwaunaoa	1	2019-02-19	1	184
706	Malaita	BCG	20/4/18		gwarata	1	2019-02-19	1	183
706	Malaita	BCG	23/4/18		Talakali	1	2019-02-19	4	179
706	Malaita	BCG	24/4/18		Gwaunaoa	1	2019-02-19	1	176
706	Malaita	BCG	25/4/18		CWD	1	2019-02-19	1	177
706	Malaita	BCG	26/4/18		busurata	1	2019-02-19	1	176
706	Malaita	BCG	29/4/18		Fauabu	1	2019-02-19	20	156
706	Malaita	BCG	2018-02-05		gwaunaoa	1	2019-02-19	4	152
706	Malaita	BCG	2018-04-05		lesiala	1	2019-02-19	5	147
706	Malaita	BCG	2018-06-05		maoa	1	2019-02-19	5	142
706	Malaita	BCG	13/5/18		maoa	1	2019-02-19	1	141
706	Malaita	BCG	16/5/18		Gwaunaoa	1	2019-02-19	1	140
706	Malaita	BCG	17/5/18		oneone	1	2019-02-19	1	139
706	Malaita	BCG	22/5/18		lwd	1	2019-02-19	50	89
706	Malaita	BCG	23/5/18		moi	1	2019-02-19	5	84
706	Malaita	BCG	24/5/18		Gwaunaoa	1	2019-02-19	1	83
706	Malaita	BCG	24/5/18		sinamauri	1	2019-02-19	2	81
706	Malaita	BCG				1	2019-02-19		258					B/C
706	Malaita	BCG	25/5/18		Fauabu	1	2019-02-19	7	251					vaccines are recorded in vials
706	Malaita	BCG	28/5/18		maoa	1	2019-02-19	1	250
706	Malaita	BCG	29/5/18		busurata	1	2019-02-19	1	249
706	Malaita	BCG	2018-01-06		dala	1	2019-02-19	10	239
706	Malaita	BCG	2018-04-06		maoa	1	2019-02-19	1	238
706	Malaita	BCG	2018-11-06		Dala	1	2019-02-19	4	234
706	Malaita	BCG	2018-12-06			1	2019-02-19		233					stock check
706	Malaita	BCG	14/6/18		Gwaunaoa	1	2019-02-19	1	232
706	Malaita	BCG	14/6/18		oneone	1	2019-02-19	5	227
706	Malaita	BCG	15/6/18		lesiala	1	2019-02-19	4	223
706	Malaita	BCG	22/6/18		Talakali	1	2019-02-19	10	213
706	Malaita	BCG	28/6/18		Busufosao	1	2019-02-19	5	208
706	Malaita	BCG	2018-02-07		maoa	1	2019-02-18	6	202
706	Malaita	BCG	16/7/18		maoa	1	2019-02-19	10	192
706	Malaita	BCG	17/7/18			1	2019-02-19		167					stock take
706	Malaita	BCG	18/7/18		busurata	1	2019-02-19	1	166
706	Malaita	BCG	18/7/18		Rafufu	1	2019-02-19	10	156
706	Malaita	BCG	24/7/18		kiu	1	2019-02-19	10	146
706	Malaita	BCG	27/7/18		Talakali	1	2019-02-19	10	136
706	Malaita	BCG	31/7/18		Fauabu	1	2019-02-19	5	131
706	Malaita	BCG	2018-02-08			1	2019-02-19		131					stock take
706	Malaita	BCG	2018-02-08	NMS		1	2019-02-19		122
706	Malaita	BCG							253
706	Malaita	BCG	2018-06-08		sinamauri	1	2019-02-19	2	251
706	Malaita	BCG	2018-06-08		sinamauri	1	2019-02-19	2	251
706	Malaita	BCG	2018-10-08		Fauabu	1	2019-02-19	10	241
706	Malaita	BCG	16/8/18		maoa	1	2019-02-19	2	239
706	Malaita	BCG	20/8/18		sinamauri	1	2019-02-19	1	238
706	Malaita	BCG	22/8/18		Gwaifai	1	2019-02-19	1	238
706	Malaita	BCG	27/8/18		Fauabu	1	2019-02-19	10	228
706	Malaita	BCG	28/8/18		busurata	1	2019-02-19	1	227
706	Malaita	BCG	30/8/18				2019-02-19		226					stock check
706	Malaita	BCG	30/8/18		pelau	1	2019-02-19	20	206
706	Malaita	BCG	26/9/18				2019-02-19		195					stock take
706	Malaita	BCG	26/9/18	NMS		1	2019-02-19	83	278
706	Malaita	BCG	2018-04-10		pelau	1	2019-02-19	20	258
706	Malaita	BCG	2018-04-10		Gwaunaoa	1	2019-02-19	1	257
706	Malaita	BCG	16/11/18			1	2019-02-19		112					stock update
706	Malaita	BCG	16/11/18	NMS		1	2019-02-19	200	312
706	Malaita	penta	2018-10-01			1	2019-09-11		1272					stock update/recorded in vials
706	Malaita	penta	17/01/18		AUKI	1	2019-09-11	100	1172
706	Malaita	penta	18/1/18		KIU	1	2019-09-11	46	1126
706	Malaita	penta	23/1/18		busurata	1	2019-09-11	15	1111
706	Malaita	penta	26/1/18		lesiala	1	2019-09-11	30	1081
706	Malaita	penta	26/1/18		a'arai	1	2019-09-11	30	1051
706	Malaita	penta	26/1/18		Talakali	1	2019-09-11	50	1001
706	Malaita	penta	2018-01-02		AUKI	1	2019-09-11	141	860
706	Malaita	penta	2018-02-02		Fauabu	1	2019-09-11	50	810
706	Malaita	penta	2018-07-02		maoa	1	2019-09-11	11	799
706	Malaita	penta	2018-08-02		areo	1	2019-09-11	10	789
706	Malaita	penta	2018-08-02			1	2019-09-11		789					stock update
706	Malaita	penta	14/2/18		sikaiana	1	2019-09-11		689
706	Malaita	penta	20/2/18		Dala	1	2019-09-11	50	639
706	Malaita	penta	23/2/18		AUKI	1	2019-09-11	224	415
706	Malaita	penta	23/2/18		oneone	1	2019-09-11	20	395
706	Malaita	penta	26/2/18		Fauabu	1	2019-09-11	10	385
706	Malaita	penta	27/2/18		busurata	1	2019-09-11	15	370
706	Malaita	penta	28/2/18		Fauabu	1	2019-09-11	50	320
706	Malaita	penta	2018-05-03		sinamauri	1	2019-09-11	40	280
706	Malaita	penta	2018-05-03			1	2019-09-11		140					stock update
706	Malaita	penta	2018-07-03		pelau	1	2019-09-11	100	40
706	Malaita	penta	14/3/18		Gwaunaoa	1	2019-09-11	5	35
706	Malaita	penta	16/3/18	NMS		1	2019-12-12		1643
706	Malaita	penta	19/3/18		auki	1	2019-12-12	54	1624
706	Malaita	penta	20/3/18		maoa	1	2019-12-12	47	1577
706	Malaita	penta	23/3/18		lesiala	1	2019-12-12	30	1547
706	Malaita	penta	23/3/18		sinamauri	1	2019-12-12	50	1497
706	Malaita	penta	27/3/18		dala	1	2019-12-12	73	1424
706	Malaita	penta	27/3/18		Gwaunaoa	1	2019-12-12	6	1418
706	Malaita	penta	27/3/18		busurata	1	2019-12-12	6	1412
706	Malaita	penta	28/3/18		Gwaifai	1	2019-12-12	10	1402
706	Malaita	penta	28/3/18		CWD	1	2019-12-12	4	1398
706	Malaita	penta	2018-03-04		Fauabu	1	2019-12-12	50	1348
706	Malaita	penta	17/4/18			1	2019-12-12		1280					stock update
706	Malaita	penta	17/4/18		Fauabu	1	2019-12-12	40	1240
706	Malaita	penta	18/4/18		Gwaunaoa	1	2019-12-12	10	1230
706	Malaita	penta	23/4/18		Talakali	1	2019-12-12	30	1185
706	Malaita	penta	24/4/18		Gwaunaoa	1	2019-12-12	10	1175
706	Malaita	penta	25/4/18		CWD	1	2019-12-12	1	1174
706	Malaita	penta	26/4/18		busurata	1	2019-12-12	15	1159
706	Malaita	penta	26/4/18		AUKI	1	2019-12-12	200	959
706	Malaita	penta	29/4/18		fauabu	1	2019-12-12	30	929
706	Malaita	penta	2018-02-05		Gwaunaoa	1	2019-12-12	15	914
706	Malaita	penta	2018-06-05		maoa	1	2019-12-12	15	899
706	Malaita	penta	2018-10-05		Talakali	1	2019-12-12	50	849
706	Malaita	penta	13/5/18		maoa	1	2019-12-12	10	839
706	Malaita	penta	17/5/18		oneone	1	2019-12-12	6	833
706	Malaita	penta	17/5/18		maoa	1	2019-12-12	10	823
706	Malaita	penta	23/5/18		moi	1	2019-12-12	30	793
706	Malaita	penta	24/5/18		gwaunaoa	1	2019-12-12	8	785
706	Malaita	penta	24/5/18		sinamauri	1	2019-12-12	20	765
706	Malaita	penta	25/5/18			1	2019-12-12		970
706	Malaita	penta				1	2019-12-12		1735
706	Malaita	penta	25/5/18		Fauabu	1	2019-12-12	9	1726
706	Malaita	penta	28/5/18		maoa	1	2019-12-12	17	1709
706	Malaita	penta	29/5/18		busurata	1	2019-12-12	20	1689
706	Malaita	penta	2018-01-06		dala	1	2019-12-12	60	1629
706	Malaita	penta	2018-04-06		maoa	1	2019-12-12	10	1619
706	Malaita	penta	2018-11-06		dala	1	2019-12-12	20	1599
706	Malaita	penta	2018-12-06		Fauabu	1	2019-12-12	50	1549
706	Malaita	penta	2018-12-06			1	12/.12/19		1554
706	Malaita	penta	14/6/18		Gwaunaoa	1	2019-12-12	5	1549
706	Malaita	penta	14/6/18		oneone	1	2019-12-12	20	1529
706	Malaita	penta	14/6/18		AUKI	1	2019-12-12	224	1305
706	Malaita	penta	15/6/18		lesiala	1	2019-12-12	17
706	Malaita	penta	26/6/18		Talakali	1	2019-12-12	30	1258
706	Malaita	penta	28/6/18		Busufosao	1	2019-12-12	20	1238
706	Malaita	penta	2018-02-07		maoa	1	2019-12-12	30	1208
706	Malaita	penta	16/7/18		maoa	1	2019-12-12	29	1179
706	Malaita	penta	17/7/18			1	2019-12-12		1138
706	Malaita	penta	18/7/18		busurata	1	2019-12-12	15	1123
706	Malaita	penta	18/7/18		Rafufu	1	2019-12-12	50	1073
706	Malaita	penta	23/7/18		Gwaifai	1	2019-12-12	10	1063
706	Malaita	penta	24/7/18		kiu	1	2019-12-12	50	1013
706	Malaita	penta	25/7/18		AUKI	1	2019-12-12	183	830
706	Malaita	penta	27/7/18		lesiala	1	2019-12-12	20	810
706	Malaita	penta	27/7/18		Talakali	1	2019-12-12	50	760
706	Malaita	penta	30/7/18		Dala	1	2019-12-12	60	700
706	Malaita	penta	31/7/18		CWD	1	2019-12-12	5	695
706	Malaita	penta	31/7/18		Fauabu	1	2019-12-12	50	645
	Malaita	penta	2018-02-08			1	2019-12-12		645					stock take
706	Malaita	penta	2018-02-08	NMS		1	2019-12-12		685
706	Malaita	penta	2018-06-08		sinamauri	1	2019-12-12	15	1315
706	Malaita	penta	2018-10-08		arao	1	2019-12-12	20	1295
706	Malaita	penta	2018-10-08		Fauabu	1	2019-12-12	20	1275
706	Malaita	penta	16/8/18		maoa	1	2019-12-12	91	1184
706	Malaita	penta	16/8/18		Fauabu	1	2019-12-12	50	1134
706	Malaita	penta	20/8/18		sinamauri	1	2019-12-12	10	1124
706	Malaita	penta	22/8/18		Gwaifai	1	2019-12-12	7	1117
706	Malaita	penta	24/8/18		lesiala	1	2019-12-12	24	1093
706	Malaita	penta	28/8/18		busurata	1	2019-12-12	10	1083
706	Malaita	penta	30/8/18		AUKI	1	2019-12-12	100	983
706	Malaita	penta	30/8/18		AUKI	1	2019-12-12	124	859
706	Malaita	penta	30/8/18		pelau	1	2019-12-12	172	677
706	Malaita	penta	26/9/18			1	2019-12-12		687					stock take
706	Malaita	penta	26/9/18	NMS		1	2019-12-12		1090
706	Malaita	penta				1	2019-12-12		1777
706	Malaita	penta	2018-04-10		pelau	1	2019-12-12	50	1727
706	Malaita	penta	2018-04-10		Gwaunaoa	1	2019-12-12	10	1717
706	Malaita	penta	16/11/18			1	2019-12-12		597
706	Malaita	penta	16/11/18	NMS		1	2019-12-12		600
706	Malaita	penta							1197
701	Malaita	pcv_13	2017-12-01		cwd	1	2019-10-18		96
701	Malaita	pcv_13	16/1/17		gwaunofou	1	2019-10-18		90
701	Malaita	pcv_13	18/1/17		gwaunofou	1	2019-10-18	4	86
701	Malaita	pcv_13	19/1/17		cwc	1	2019-10-18	3	83
701	Malaita	pcv_13	19/1/17		sango	1	2019-10-18	7	76
701	Malaita	pcv_13	19/1/17		tatali	1	2019-10-18	10	66
701	Malaita	pcv_13	21/1/17	atoifi		1	2019-10-18	100	130					30 doses still instock
701	Malaita	pcv_13	26/1/17		cwc	1	2019-10-18	17	126	4
701	Malaita	pcv_13	2017-02-02		cwc	1	2019-10-18		129
701	Malaita	pcv_13	2017-09-02		Darione	1	2019-10-18	11	110
701	Malaita	pcv_13	2017-09-02		cwc	1	2019-10-18		106	4
701	Malaita	pcv_13	16/2/17	sango		1		106	117
701	Malaita	pcv_13	22/2/17	atoifi		1		30	147
701	Malaita	pcv_13	2017-01-03		sango	1		15	132
701	Malaita	pcv_13	2017-02-03		cwc	1			139
701	Malaita	pcv_13	2017-03-03	sango		1		13	147
701	Malaita	pcv_13	2017-08-03					44						balance in stock
701	Malaita	pcv_13	2017-08-03	atoifi		1		100	144
701	Malaita	pcv_13	2017-09-03	iwc		1		6	138	6
701	Malaita	pcv_13	16/3/17		cwc	1			124
701	Malaita	pcv_13	2017-05-04		sango	1		5	36
701	Malaita	pcv_13	2017-06-04		Darione	1		6	30
701	Malaita	pcv_13	2017-06-04		cwc	1	2019-10-18	3	37
701	Malaita	pcv_13	2017-12-04	atoifi			2019-10-18	32	69
701	Malaita	pcv_13	2017-11-04		gwaunarata	1	2019-10-18	10	59
701	Malaita	pcv_13	13/4/17		tatali	1	2019-10-18	5	54
701	Malaita	pcv_13	15/4/17		gwaunafou	1	2019-10-18	5	49
701	Malaita	pcv_13	15/4/17		ambu		2019-10-18	6	43
701	Malaita	pcv_13	15/4/17		gwounafou	1	2019-10-18	5	39
701	Malaita	pcv_13	15/4/17		cwc	1	2019-10-18	1	33
701	Malaita	pcv_13	23/5/17	atoifi		1	2019-10-18	52
701	Malaita	pcv_13	25/5/17		cwc	1	2019-10-18	4	48
701	Malaita	pcv_13	15/6/17		iwc	1	2019-11-18	2	46
701	Malaita	pcv_13	15/6/17		Darione	1	2019-11-18	5	41
701	Malaita	pcv_13	15/6/17			1	2019-10-18	5	36
701	Malaita	pcv_13	15/6/17		sango	1	2019-10-18	5	31
701	Malaita	pcv_13	16/6/17						119					stock take
701	Malaita	pcv_13	2017-06-07		cwc		2019-10-18	6	113
701	Malaita	pcv_13	13/7/17		darione		2019-10-18	6	106
701	Malaita	pcv_13	20/7/17		cwc		2019-10-18	2	104
701	Malaita	pcv_13	25/7/17	atoifi		1	2019-11-18	100	166
701	Malaita	pcv_13	27/7/17		cwc	1	2019-11-18	6	160
701	Malaita	pcv_13	2017-03-08		cwc	1	2019-11-18	5	155
701	Malaita	pcv_13	2017-10-08		tatali	1	2019-11-18	3	152
701	Malaita	pcv_13	2017-10-08		Darione	1	2019-11-18	3	149
701	Malaita	pcv_13	2017-10-08		NACH	1	2019-11-18	4	145
701	Malaita	pcv_13	17/8/17		cwc	1	2019-11-18	2	143
701	Malaita	pcv_13	24/8/17		cwc	1	2019-11-18	4	139
701	Malaita	pcv_13	2017-07-09		cwc	1	2019-11-18	1	138
701	Malaita	pcv_13	13/9/17		sango	1	2019-11-18	5	127
701	Malaita	pcv_13	14/9/17		cwc	1	2019-11-18	3	124
701	Malaita	pcv_13	20/9/17		gwaurata	1	2019-11-18	10	114
701	Malaita	pcv_13	22/9/17		gwaurata	1	2019-10-18	3
701	Malaita	pcv_13	2017-02-09		gwaurata	1		12
701	Malaita	pcv_13	25/9/17		mamulele	1		10
701	Malaita	pcv_13	27/7/17	atoifi		1	2019-04-19	150	150
701	Malaita	pcv_13	28/7/17		tatali	1	2019-04-19	4	146
701	Malaita	pcv_13	2017-04-10		ambu	1	2019-04-19	6	139
701	Malaita	pcv_13	2017-05-10		Darione	1	2019-04-19	6	135
701	Malaita	pcv_13	2017-10-10		opd	1	2019-04-19	1	132
701	Malaita	pcv_13	2017-11-10		iwc	1	2019-04-19	1	131
701	Malaita	pcv_13	2017-12-10		sango	1	2019-04-19	6	125
701	Malaita	pcv_13	26/10/17		iwc	1	2019-04-19	2	119
701	Malaita	pcv_13	26/10/17		tatali	1	2019-04-19	3	116
701	Malaita	pcv_13	26/10/17	tatali			2019-04-19	2	118
701	Malaita	pcv_13	2017-09-11		gwaurata	1	2019-04-19	3	115
701	Malaita	pcv_13	2017-09-11		NAP	1	2019-04-19	6	101
701	Malaita	pcv_13	2017-09-11		cwc	1	2019-04-19	5	96
701	Malaita	pcv_13	14/11/17						79					balance in stock
701	Malaita	pcv_13	22/11/17		sango	1	2019-04-19	6	73
701	Malaita	pcv_13	24/11/17	atoifi		1	2019-04-19	50	172
701	Malaita	pcv_13	2017-02-12	iwc		1	2019-04-19	1	171
701	Malaita	pcv_13	2018-04-01	cwc		1	2019-04-19	1	169
701	Malaita	pcv_13	2018-11-01	iwc		1	2019-04-19	4	105	4
701	Malaita	pcv_13	18/1/18		cwc	1	2019-04-19	1	164
701	Malaita	pcv_13	18/6/18			1	2019-01-20	23	23
701	Malaita	pcv_13	21/6/18		cwc	1	2020-01-01	2	21
701	Malaita	pcv_13	2018-06-07		a'arai	1	2019-01-20	15
701	Malaita	pcv_13	2018-12-07		cwc	1	20/1	4
701	Malaita	pcv_13	20/7/18		iwc	1	2019-01-20	1
701	Malaita	pcv_13	25/7/18		mamulele	1	2019-01-20	10
701	Malaita	pcv_13	25/7/18		gwaurata	1	2019-01-20	10
701	Malaita	pcv_13	26/7/18		sango	1	2019-01-20	8
701	Malaita	pcv_13	30/7/18		iwc	1		6	107
701	Malaita	pcv_13	2018-02-08			1			102
701	Malaita	pcv_13	30/8/18		iwc	1		4	98
701	Malaita	pcv_13	2018-12-09		iwc	1		4	94
701	Malaita	pcv_13	13/9/18		gwaurata	1		4	189
701	Malaita	pcv_13		atoifi		1		2	92
701	Malaita	pcv_13	13/9/18	atoifi		1	2020-01-01	50	68
701	Malaita	pcv_13	20/9/18		iwc	1		4	64
701	Malaita	pcv_13	26/9/18		sango	1	2019-01-20	8	54
701	Malaita	pcv_13	28/9/18		iwc	1		4	50
701	Malaita	pcv_13	2018-04-10		tatali	1		10	40
701	Malaita	pcv_13	2018-04-10		iwc	1		1	39
701	Malaita	pcv_13	2018-10-10		gwaurata	1		2	37
701	Malaita	pcv_13	18/10/18		Darione	1		6	31
701	Malaita	pcv_13	18/10/18		iwc	1		3	28
701	Malaita	pcv_13	15/10/18		cwc	1		5	23
701	Malaita	penta	2017-05-01		cwc		2019-09-17	2	136	2
701	Malaita	penta	2017-12-01		cwc		2019-09-17	7	129
701	Malaita	penta	16/1/17		gwaunafou	1	2019-09-17	6	123
701	Malaita	penta	18/1/17		gwaunafou	1	2019-09-17	4	199
701	Malaita	penta	19/1/17		cwc	1	2019-09-17	3	196
701	Malaita	penta	19/1/17		sango	1	2019-09-17	8	188
701	Malaita	penta	19/1/17		tatali	1	2019-09-17	10	178
701	Malaita	penta	19/1/17		anomea	1	2019-09-17	11	167
701	Malaita	penta	21/01/17	atoifi		1	2019-09-17	100	267					stored doses 74
701	Malaita	penta	26/1/17			1	2019-09-17			4
701	Malaita	penta	26/1/17		ambu	1	2019-09-17	12	255
701	Malaita	penta	28/1/17		tatali	1		5	250
701	Malaita	penta	2017-02-02		cwc				246	4
701	Malaita	penta	2017-09-02		Darione	1	2019-04-18	11	235
701	Malaita	penta	2017-09-02				2019-04-18		239		4
701	Malaita	penta	2017-09-02		cwc		2019-04-18			4
701	Malaita	penta	16/2/17	sango			2019-04-18	11	224	2
701	Malaita	penta	22/2/17	atoifi		1	2019-04-18	34	180
701	Malaita	penta	23/2/17		cwc	1	2019-04-18		178	2
701	Malaita	penta	2017-01-03		sango	1	2019-04-18	15	163
701	Malaita	penta	2017-02-03	sango		2	2019-04-18	11	174
701	Malaita	penta	2017-03-03	sango		1	2019-04-18		171	3
701	Malaita	penta	2017-08-03			1	2019-04-18		67					balance stock
701	Malaita	penta	2017-09-03	atoifi		1	2019-04-18	100	167
701	Malaita	penta	2017-09-03		iwc	1	2019-04-18	6	160	6
701	Malaita	penta	16/3/17		gwaurata	1	2019-04-18	8	152
701	Malaita	penta	16/3/17		cwc	1	2019-04-18	2	150
701	Malaita	penta	2017-04-04						111					stock check
701	Malaita	penta	2017-05-04		gwaunafou	1	2019-04-18	5	106
701	Malaita	penta	2017-05-04		sango	1	2019-04-18	5	101
701	Malaita	penta	2017-06-04		cwc	1	2019-04-18	5	96
701	Malaita	penta	2017-06-04		Darione	1	2019-04-18	3	93
701	Malaita	penta	2017-12-04	atoifi			2019-04-18	50	143
701	Malaita	penta	13/4/17		gwaunafou	1	2019-04-18	5	138
701	Malaita	penta	13/4/17		ambu	1	2019-04-18	6	132
701	Malaita	penta	13/4/17		tatali	1	2019-04-18	5	128
701	Malaita	penta	14/4/17		gwaurata	1	2019-04-18	10	118
701	Malaita	penta	2017-11-05		gwaunafou	1	2019-04-18	5	113
701	Malaita	penta	2017-11-05		tatali	1	2019-04-18	5	108
701	Malaita	penta	2017-11-05		cwc	1		1	107
701	Malaita	penta	23/5/17	atoifi		1	2019-04-18	100	207
701	Malaita	penta	25/5/17		cwc	1	2019-04-18		96
701	Malaita	penta	15/6/17		anumosa	1	2019-04-18	10	86
701	Malaita	penta	15/6/17		iwc	1	2019-04-18	1	84
701	Malaita	penta	15/6/17		Darione	1	2019-04-18	10	74
701	Malaita	penta	15/6/17		anumosa	1	2019-04-18	10	64
701	Malaita	penta	15/6/17		sango	1	2019-04-18	15	49
701	Malaita	penta	2017-06-07		cwc	1	2019-11-19	6	144
701	Malaita	penta	13/7/17		cwc	1	2019-11-19		143
701	Malaita	penta	13/7/17		Darione	1	2019-11-19	6	137
701	Malaita	penta	20/7/17		cwc	1	2019-11-19	1	136
701	Malaita	penta	20/7/17		mamulele	1	2019-11-19	8	128
701	Malaita	penta	20/7/17		a'arai	1	2019-11-19	15	113
701	Malaita	penta	25/7/17	atoifi		1	2019-11-19	100	198
701	Malaita	penta	27/7/17	cwc			2019-11-19	6	192
701	Malaita	penta	2017-03-08		cwc	1	2019-11-19	5	185
701	Malaita	penta	2017-10-08		tatali	1	2019-11-19	3	182
701	Malaita	penta	2017-10-08		Darione	1	2019-11-19	3	179
701	Malaita	penta	2017-10-08		NAHC	1	2019-11-19	3	176
701	Malaita	penta	17/8/17		cwc	1	2019-11-19	2	174
701	Malaita	penta	24/8/17		cwc	1	2019-11-19	4	170
701	Malaita	penta	2017-07-09		cwc	1	2019-11-19	1	169
701	Malaita	penta	2017-09-09		Darione	1	2019-11-19	6	163
701	Malaita	penta	13/9/17		sango	1	2019-11-19	5	158
701	Malaita	penta	14/9/17		cwc	1	2019-11-19	3	155
701	Malaita	penta	20/9/17		gwaurata	1	2019-11-19	10	145
701	Malaita	penta	22/9/17	gwaurata		2	2019-11-19	4
701	Malaita	penta	25/9/17		gwaurata	1	2019-11-19	12
701	Malaita	penta	25/9/17		mamulele	1	2019-11-19	10
701	Malaita	penta	27/9/17	atoifi		1	2019-11-19	100	100
701	Malaita	penta	28/9/17	tatali		1	2019-11-19	4	96
701	Malaita	penta	28/9/17		cwc	1	2019-11-19	1	95
701	Malaita	penta	2017-03-10		Darione	1	2019-11-19	6	84
701	Malaita	penta	2017-10-10		opd	1	2019-11-19	1	83
701	Malaita	penta	18/10/17		iwc	1	2019-11-19	1	82
701	Malaita	penta	14/11/17				2019-11-19		82					balance in stock
701	Malaita	penta	21/11/17		sango	1	2019-11-19	6	76
701	Malaita	penta	23/11/17		cwc	1	2019-11-19	1	75
701	Malaita	penta	24/11/17	atoifi		1	2019-11-19	50	102
701	Malaita	penta	13/12/17	atoifi		1	2019-11-19	50	152
701	Malaita	penta	2018-04-01		cwc	1	2019-11-19	2	149
701	Malaita	penta	2018-11-01		iwc	1	2019-11-19	4	145	4
701	Malaita	penta	25/1/18		cwc	1	2019-11-19	2	142
701	Malaita	penta	2018-08-02		sango	1	2019-11-19	10	119
701	Malaita	penta	2018-08-03		cwc	1	2019-11-19	5	105
701	Malaita	penta	15/3/18		gwaunafou	1	2019-11-19	2	93
701	Malaita	penta	19/3/18			1	2019-11-19	100	178
701	Malaita	penta	2018-06-04	atoifi		1	2019-11-19	122	122
701	Malaita	penta	18/6/18			1	2019-12-12	100	113
701	Malaita	penta	21/6/18		cwc	1	2019-09-11	2	111
701	Malaita	penta	2019-06-07		a'arai	1	2019-12-19	20	91
701	Malaita	penta			cwc	1	2019-12-19	3	89
701	Malaita	penta		atoifi		1		100	189
701	Malaita	penta			iwc	1		2	187
701	Malaita	penta	25/7/18		mamulele	1		10
701	Malaita	penta	25/7/18		gwaurata	1		10
701	Malaita	penta	25/7/18		sango	1		8
701	Malaita	penta	26/7/18		iwc	1		6
701	Malaita	penta	30/7/18			1	2019-09-11		108
701	Malaita	penta	2018-02-09		iwc	1	2019-12-12	5	103
701	Malaita	penta	2018-12-09			1	2019-12-12		22
701	Malaita	penta	13/9/18			1	2019-12-12		72
701	Malaita	penta	20/9/18		iwc	1	2019-12-12	4	68
701	Malaita	penta			iwc	1	2019-12-12	3	65
701	Malaita	penta	26/9/18		sango	1	2019-12-12	8	57
701	Malaita	penta	28/9/18		iwc	1	2019-12-12	4	53
701	Malaita	penta	2018-04-10		tatali	1	2019-12-12	10	43
701	Malaita	penta	2018-04-10		inc	1	2019-12-12	1	42
701	Malaita	penta	2018-10-10		gwaurata	1	2019-12-12	2	40
701	Malaita	penta	18/10/18		Darione	1	2019-12-12	6	34
701	Malaita	penta	18/10/18		cwc	1	2019-12-12	3	31
701	Malaita	penta	15/11/18		cwc	1	2019-12-12	3	26
902	Temotu	Heb B	18/9/17	Lata	CHT/CWC	2	20/10/17	7	7	0	0	0	0	no proper recordings done
902	Temotu	Heb B	26/9/17		kalabay/a/post	2	20/10/17		6	1	0	0	0
902	Temotu	Heb B	28/9/17		maternirty	2	20/10/17		5	1	0	0	0	5 vials expire so return to slms
902	Temotu	Heb B	14/11/17	lata slms	cwc	1		10	10	1	0	0	0
902	Temotu	Heb B	2018-06-01		Neo	1			9	1	0	0	0
902	Temotu	Heb B	2018-06-01		maternirty	1			8	2	0	0	0
902	Temotu	Heb B	2018-10-01		maternity	1			6	2	0	0	0
902	Temotu	Heb B	14/2/18		maternity	1			4	1	0	0	0
902	Temotu	BCG	18/9/17	lata slms	p/natal	1	2019-10-17	60	60	3	17	0	17	new stock take begin
902	Temotu	BCG	19/9/17		CHT/CWC	1	2019-10-17		40	1	19	0	19
902	Temotu	BCG	25/9/17		kalabay/a/post	1	2019-10-17		20	1	19	0	19
902	Temotu	BCG	25/9/17		CHT/CWC	1	2019-10-17		0					stock left in fridge
902	Temotu	BCG	2017-09-10	lata slms	p/natal	1	2019-02-01	200	200	1	19	0	19	new order/new stock
902	Temotu	BCG	2017-10-10		cwc	1	2019-02-19		180	1	19	0	19
902	Temotu	BCG	24/10/17		cwc	1	2019-02-19		160	2	18	0	18
902	Temotu	BCG	30/10/17		p/natal	1	2019-02-19		140	1	19	0	19
902	Temotu	BCG	31/10/17		cwc	1	2019-02-19		120	1	19	0	19
902	Temotu	BCG	14/11/17		cwc	1	2019-02-19		100	1	19	0	19
902	Temotu	BCG	20/11/17		p/natal	1	2019-02-19		80	1	19	0	19
902	Temotu	BCG	2017-12-12		cwc	1	2019-02-19		60	1	19	0	19
902	Temotu	BCG	2018-02-01		p/natal	1	2019-02-19		40	1	19	0	19
902	Temotu	BCG	2018-08-01		cwc	1	2019-02-19		20	2	18	0	18
902	Temotu	BCG	2018-08-01		CHT/CWC	1	2019-02-19	100	100					0 balance left/ re-order
902	Temotu	BCG	2018-12-02		cwc	1	2019-02-19		100	1	19	0	19	5 vials left
902	Temotu	BCG	2018-12-02			1			80
902	Temotu	BCG	2018-03-04		maternity	1	2019-02-19		60
902	Temotu	BCG	13/4/18		graciosa bay	1	2019-02-19		40	1	19	9	19
902	Temotu	Heb b single dose	20/3/18		maternity	2			3	1	0	0	0
902	Temotu	heb b	20/3/18		CHT/CWC	2			2	0	0	0	0	balance left in stock
902	Temotu	Heb b single dose	21/3/18		maternity	2			0	2	0	0	0
902	Temotu	Heb b single dose	2018-10-04	slms	CHT/CWC	1	2019-01-05	3	3					new order/new stock
902	Temotu	penta	18/8/17	lata slms	p/natal	1	2019-11-19		16	4			0
902	Temotu	penta	18/9/17	lata slms	CHT/CWC	1	2019-11-19	50	62	5
902	Temotu	penta	26/9/17	lata slms	kalabay/a/post	1	2019-11-19		62	5			0
902	Temotu	penta	26/9/17	lata	manoputi	1	2019-11-19		57	3			0
902	Temotu	penta	26/9/17	lata	CHT/CWC	1	2019-11-19		54					stock left in fridge
902	Temotu	penta	2017-02-10	lata slms	cht	1	2019-11-19		54	3			0
902	Temotu	penta	2017-03-10	lata	cht	1			45	3
902	Temotu	penta	2017-03-10						42
902	Temotu	penta	2017-09-10	lata	cht	1	2019-11-19		92	4		0	0
902	Temotu	penta	18/10/17	lata slms	CHT	1	2019-11-19		88	6		0	0
902	Temotu	penta	19/10/17		cwc	1	2019-11-19		82	9	0	0	0
902	Temotu	penta	23/10/17		p/natal	1	2019-11-19		73	2		0	0
902	Temotu	penta	24/10/17		cwc	1	2019-11-19		71	5	0	0	0
902	Temotu	penta	26/10/17		f/up immunization	1	2019-11-19		66	1	0	0	0
902	Temotu	penta	30/10/17		cwc	1	2019-11-19		65	8	0	0	0
902	Temotu	penta	31/10/17		immunization	1			57	1	0	0	0
902	Temotu	penta	2017-06-11		p/natal	1	2019-11-19		56	3	0	0	0
902	Temotu	penta	2017-07-11		cwc	1	2019-11-19		42	5	0	0	0
902	Temotu	penta	13/11/17		p/natal	1	2019-11-19		37	7	0	0	0
902	Temotu	penta	13/11/17		manoputi	1	2019-11-19		30	8	0	0	0
902	Temotu	penta	14/11/17		cwc	1	2019-11-19		22	5	0	0	0
902	Temotu	penta	20/11/17		p/natal	1	2019-11-19		17	5	0	0	0
902	Temotu	penta	21/11/17		cwc	1	2019-11-19		112	4	0	0	0
902	Temotu	penta	27/11/17		p/natal	1	2019-11-19		108	2	0	0	0
902	Temotu	penta	28/11/17		cwc	1	2019-11-19		106	7	0	0	0
902	Temotu	penta	2017-04-12		p/natal	1	2019-11-19		99	3	0	0	0
902	Temotu	penta	2017-05-12		cwc	1	2019-11-19		88	6	0	0	0
902	Temotu	penta	2017-11-12		p/natal	1	2019-11-19		82	5	0	0	0
902	Temotu	penta	2017-12-12		cwc	1	2019-11-19		77	3	0	0	0
902	Temotu	penta	2018-02-01		cwc	1	2019-11-19		73	5	0	0	0
902	Temotu	penta	2018-08-01		p/natal	1	2019-11-19		68	9	0	0	0
902	Temotu	penta	2018-09-10		cwc	1	2019-11-19		59	11	0	0	0
902	Temotu	penta	2018-10-01		cwc	1	2019-11-19		48	1	0	0	0
902	Temotu	penta	15/1/18		p/natal	1	2019-11-19		97	4	0	0	0
902	Temotu	penta	16/1/18		cwc	1	2019-11-19		93	16	0	0	0
902	Temotu	penta	22/1/18		p/natal	1			77	5	0	0	0
902	Temotu	penta	22/1/18		kati	1			72	3	0	0	0
902	Temotu	penta	23/1/18			1	2019-11-19		69	1	0	0	0
902	Temotu	penta	29/1/18		cwc	1	2019-11-19		68	2	0	0	0
902	Temotu	penta	320/1/18		f/up immunization	1			66	1	0	0	0
902	Temotu	penta	30/1/18		cht	1	2019-11-19		65	0	0	0	0
902	Temotu	penta	2018-05-02		cwc	2	2019-11-19		65	10	0	0	0
902	Temotu	penta	13/2/18		f/up immunization	2	2019-11-19		55	2	0	0	0
902	Temotu	penta	19/2/18		p/natal	2	2019-11-19		53	6	0	0	0
902	Temotu	penta	20/2/18		cwc	2	2019-11-19		47	5	0	0	1
902	Temotu	penta	26/2/18		p/natal	2	2019-11-19		39	4	0	0	0
902	Temotu	penta	27/2/18		cwc	2	2019-11-19		42	4	0	0	0
902	Temotu	penta	28/2/18		f/up immunization	2	2019-11-19		34	1	0	0	0
902	Temotu	penta	2018-02-03		p/natal	2	2019-11-19	50	86	0	0	0	0
902	Temotu	penta	2018-05-03		kati clinic	2	2019-11-19		80	6	0	0	0
902	Temotu	penta	2018-05-03		cwc	2	2019-11-19		74	3	0	0	0
902	Temotu	penta	2018-06-03		cwc	2	2019-11-19		71	5	0	0	0
902	Temotu	penta	2018-06-03		otomongi	2	2019-11-19		66	3	0	0	0
902	Temotu	penta	2018-07-03		f/up immunization	2	2019-11-19		63	1	0	0	0
902	Temotu	penta	2018-12-03		p/natal	2	2019-11-19		62	4	0	0	0
902	Temotu	penta	2018-12-03		clinic	2	2019-11-19		58	5	0	0	0
902	Temotu	penta	13/3/18		cwc	2	2019-11-19		53	6	0	0	0
902	Temotu	penta	19/3/18		p/natal	2	2019-11-19		47	4	0	0	0
902	Temotu	penta	20/3/18		cwc	2	2019-11-19		43	7	0	0	0
902	Temotu	penta	21/3/18			2			36	1	0	0	0
902	Temotu	penta	21/3/18		CHT	2	2019-11-19		35	1	0	0	0
902	Temotu	penta	26/3/18		p/natal	2	2019-11-19		34	3	0	0	0
902	Temotu	penta	27/3/18		cwc	2	2019-11-19		31	10	0	0	0
902	Temotu	penta	2018-03-04		graciosa bay	2	2019-11-19		21			4	4
902	Temotu	penta	2018-04-04		p/natal	2	2019-11-19		17	5	0	0	0
902	Temotu	penta	2018-05-04		cwc	2	2019-11-19		12	1	0	0	0
902	Temotu	penta	2018-09-04		p/natal	2	2019-11-19		11	5	0	0	0
902	Temotu	penta	2018-10-04		cwc	2	2019-11-19		6	3	0	0	0
902	Temotu	penta	2018-10-04	slms	CHT	1	2019-11-19	21	3	0	0	0	0
902	Temotu	penta	13/4/18		graciosa bay	1	2019-11-19		24	2	0	0	0
902	Temotu	penta	16/4/18		p/natal	1	2019-11-19		22	5	0	0	0
902	Temotu	penta	23/4/18	slms	CHT/CWC	1	2019-12-12	50
902	Temotu	OPV	18/9/17	lata slms	p/natal	2	2019-10-17		28	4	4	0	1
902	Temotu	OPV	18/9/17	lata slms	cht	2	2019-08-18	100	100	0	0	0	0
902	Temotu	OPV	19/9/17	lata slms	kalabay/a/post	1			100	5	7	0	0
902	Temotu	OPV	20/9/17	lata slms	manoputi	1			97	3	4	0	0
902	Temotu	OPV	21/9/17	cht		1			94	2	2	0	0
902	Temotu	OPV	2017-01-10			1	2019-08-18		92	3	9	0	0
902	Temotu	OPV	2017-06-10			1	2019-08-18		84	3	6	0	0
902	Temotu	OPV	2017-09-10	slms	cwc	1	2019-08-18	100	181	9	7	0
902	Temotu	OPV	16/10/17		cwc	1			172	6	1	0	0
902	Temotu	OPV	19/10/17		cwc	1			166	9	1	0	0
902	Temotu	OPV	23/10/17		p/natal	1	2019-11-19		157	2	7	0	0
902	Temotu	OPV	24/10/17		cwc	1			155	5	2	0	0
902	Temotu	OPV	26/10/17		f/up immunization	1	2019-11-19		150	1	1	0	0
902	Temotu	OPV	30/10/17						149	8	2	0	0
902	Temotu	OPV	31/10/17		f/up immu	1	2019-11-19		141	1	1	0	0
902	Temotu	OPV	2017-06-11		P/NC	2	2018-08-01		140	3	8	0	0
902	Temotu	OPV	2017-07-11		cwc	2	2019-08-18		138	5	0	0	0
902	Temotu	OPV	2017-08-11		school visit	2	2019-08-18		133	12	0	0	0
902	Temotu	OPV	13/11/17		P/NC	2	2019-08-18		121	7	7	0	0
902	Temotu	OPV	14/11/17		cwc		2019-08-18		114	5	9	0	0
902	Temotu	OPV	15/11/17		CHT	2	2019-08-18		109	5	4	0	0
902	Temotu	OPV	15/11/17		cht	2	2019-08-18		104	4	0	0	0
902	Temotu	OPV	20/11/17		P/NC	2	2019-08-18		100	2	8	0	0
902	Temotu	OPV	21/11/17		cwc	2	2019-08-18		98	7	1	0	0
902	Temotu	OPV	27/11/17		P/NC	2	2019-08-18		91	5	6	0	0
902	Temotu	OPV	28/11/17		cwc	2	2019-08-18		86	9	7	0	0
902	Temotu	OPV	2017-04-12		P/NC	2	2019-08-18		77	3	4	0	0
902	Temotu	OPV	2017-05-12		cwc	2	2019-08-18		74	6	4	0	0
902	Temotu	OPV	2017-11-12		P/NC	2	2019-08-18		74	5	9	0	0
902	Temotu	OPV	2017-12-12		cwc	2	2019-08-18		69	12	3	0	0
902	Temotu	OPV	18/12/17		P/NC	2	2019-08-18		57	2	1	0	0
902	Temotu	OPV	2017-05-12		cwc	1	2019-11-18		86	6	0	0	0
902	Temotu	OPV	2017-11-12		P/NC	1	2019-11-18		80	5	0	0	0
902	Temotu	OPV	2017-11-12		kati A/post	1	2019-11-18		77	3	0	0	0
902	Temotu	OPV	2017-12-12		cwc	1	2019-11-18		74	12	0	0	0
902	Temotu	OPV	18/12/17		P/NC	1	2019-11-18		62	2	0	0	0
902	Temotu	OPV	19/12/17		cwc	1	2019-11-18		60	7	0	0	0
902	Temotu	OPV	21/12/17		f/up immu	1	2019-11-18		53	1	0	0	0
902	Temotu	OPV	2018-02-01		cwc	1	2019-11-18		52	5	0	0	0
902	Temotu	OPV	2018-08-01		P/NC	1	2019-11-18		47	8	0	0	0
902	Temotu	OPV	2018-09-01		cwc	1	2019-11-18		39	12	0	0	0
902	Temotu	OPV	2018-10-01		f/up immu	1	2019-11-18		27	1	0	0	0
902	Temotu	OPV	15/1/18		P/NC	1	2019-11-18		26	4	0	0	0
902	Temotu	OPV	15/1/18		CHT	1	2019-11-18	50	22	0	0	0	0
902	Temotu	OPV	16/1/18		cwc	1	2019-11-18		72	16	0	0	0
902	Temotu	OPV	22/1/18		p/nc	1	2019-11-18		52	5	0	0	0
902	Temotu	OPV	22/1/18		kati	1	2019-11-18		47	2	0	0	0
902	Temotu	IPV	18/9/17		P/N	1	2019-11-18		7	0	0	0	0
902	Temotu	IPV	19/9/17		CHT	1	2019-11-18	50	57	0	0	0	0
902	Temotu	IPV	26/9/17		kalabay/a/post	1	2019-11-18		57	1	0	0	0
902	Temotu	IPV	26/9/17		cwc	1	2019-11-18		56	7	0	0	0
902	Temotu	IPV	2017-02-10		P/NC	1	2019-11-18		49	1	0	0	0
902	Temotu	IPV	2017-03-10		CWC	1	2019-11-18		48	3	0	0	0
902	Temotu	IPV	2017-10-10		CWC1	1	2019-11-18		45	6	0	0
902	Temotu	IPV	17/10/17		CWC	1	2019-11-18		39	4	0	0
902	Temotu	IPV	24/10/17		CWC	1	2019-11-18		35	3	0	0
902	Temotu	IPV	26/10/17		CATCH UP	1	2019-11-18		32	1	0	0
902	Temotu	IPV	30/10/17		KATI AP	1	2019-11-18		31	1	0	0
902	Temotu	IPV	31/10/17		CHT	1	2019-11-18		30	1	0	0
902	Temotu	IPV	2017-06-11		PNC	1	2019-11-18		29	1	0	0
902	Temotu	IPV	2017-07-11		CWC	1	2019-11-18		28	1	0	0
902	Temotu	IPV	13/11/17		PNC	1	2019-11-18		27	2	0	0
902	Temotu	IPV	20/11/17		PNC	1	2019-11-18		23	1	0	0
902	Temotu	IPV	21/11/17		CWC	1	2019-11-18		22	1	0	0
902	Temotu	IPV	27/11/17		PNC	1	2019-11-18		21	1	0	0
902	Temotu	IPV	28/11/17		KATI	1	2019-11-18		20	1	0	0
902	Temotu	IPV	2017-04-12		MONA	1	2019-11-18		19	3	0	0
902	Temotu	IPV	2017-05-12		CWC	1	2019-11-18		16	1	0	0
902	Temotu	IPV	2017-05-12		MONA	1	2019-11-18		15	3	0	0
902	Temotu	IPV	2017-12-12		CWC	1	2019-11-18		12	4	0	0
902	Temotu	IPV	18/12/17		PNC	1	2019-11-18		8	1	0	0
902	Temotu	IPV	19/12/17		CWC	1	2019-11-18		7	6	0	0
902	Temotu	IPV	2018-02-01		CWC	1	2019-11-18		1	1	0	0
902	Temotu	IPV	2018-08-01	slms	CHT	1	2019-11-18	20	20
902	Temotu	IPV	2018-09-01		CWC	1	2019-11-18		20	5	0	0
902	Temotu	IPV	2018-10-01		CW C	1	2019-11-18		15	1	0	0
902	Temotu	IPV	10/1`/18		CATCH UP	1	2019-11-18		14	0	0	0
902	Temotu	IPV	22/1/18		PNC	1	2019-11-18		9	1	0	0
902	Temotu	IPV	23/1/18		CWC	1	2019-11-18		8	1	0	0
902	Temotu	IPV	30/1/18		CWC	1	2019-11-18		7	1	0	0
902	Temotu	IPV	2018-05-02		CWC	1	2019-11-18		6	4	0	0
902	Temotu	IPV	13/2/18		CHT	1	2019-11-18		2	9	0	0
902	Temotu	IPV	20/2/18		CWC	1	2019-11-18		4	2	0	0
902	Temotu	IPV	2018-02-03		CWC	1	2019-11-18	20	2	0	0	0
902	Temotu	IPV	2018-05-03		PNC	1	2019-11-18		22	1	0	0
902	Temotu	IPV	2018-06-03		CWC	1	2019-11-18		21	3	0	0
902	Temotu	IPV	2018-07-03		C/UP	1	2019-11-18		18	1	0	0
902	Temotu	IPV	2018-12-03		PNC	1	2019-11-18		17	0	0	0
902	Temotu	IPV	13/3/18		CWC	1	2019-11-18		17	4	0	0	0
902	Temotu	IPV	19/3/18		PNC	1	2019-11-18		13	0	0	0
902	Temotu	IPV	20/3/18		CWC	1	2019-11-18		13	2	0	0
902	Temotu	IPV	21/3/18		C/UP	1	2019-11-18		11	1	0	0
902	Temotu	IPV	27/3/18		CWC	1	2019-11-18		10	4	0	0
902	Temotu	IPV	2018-03-04		graciosa bay	1	2019-11-18		6			2	2	ISSUED TO BT NOT OPENNED
902	Temotu	IPV	2018-08-04		CWC	1	2019-11-18		4	3
902	Temotu	IPV	2018-10-04	slms	CHT	1	2019-07-11	15	1	2	0	0	0
902	Temotu	IPV	16/4/18		PNC	1	2019-07-11		14	2	0	0
902	Temotu	IPV	24/10/17		CHT	1	2019-11-18		44	5	0	0
902	Temotu	IPV	26/10/17		CHT	1	2019-11-18		39	1	0	0	0
902	Temotu	IPV	26/10/17		kalabay/a/post	1	2019-11-18		38	1	0	0	0
902	Temotu	IPV	30/10/17		PNC	1	2019-11-18		37	8	0	0
902	Temotu	IPV	30/10/17		KATI	1	2019-11-18		29	1	0	0
902	Temotu	IPV	31/10/17		CHT	1	2019-11-18		28	1	0	0
902	Temotu	IPV	2017-06-11		PNC	1	2019-11-18		25	3	0	0
902	Temotu	IPV	2017-07-11		PNC	1	2019-11-18		20	5	0	0
902	Temotu	IPV	13/11/17		PNC	1	2019-11-18		15	7	0	0
902	Temotu	IPV	14/11/17		CWC	1	2019-11-18		12	5	0	0	0
902	Temotu	IPV	15/11/17	slms	LATA CHT	1	2019-11-18	100	7	0	0	0
902	Temotu	IPV	20/11/17		PNC	1	2019-11-18		107	5	0	0
902	Temotu	IPV	21/11/17		CWC	1	2019-11-18		102	4	0	0
902	Temotu	IPV	27/11/17		PNC	1	2019-11-18		98	2	0	0
902	Temotu	IPV	28/11/17		CWC	1	2019-11-18		96	7
902	Temotu	IPV	2017-04-12		PNC	1	2019-11-18		89	3	0	0
902	Temotu	TETOX	18/9/17			1	2019-09-18		100	4	6	0	0	ONLY ENTRY SEEN FOR TETOX IN THE VACCINE STOOCK RECORD BOOK.
902	Temotu	MR	18/9/17	lata slms		1	2019-12-17		30
902	Temotu	MR	18/9/17			1	2019-12-17	100	130					THE ONLY TWO ENTERY FOR MR VACCINE SEEN IN THE VACCINE STOCK BOOK
902	Temotu	PCV	23/1/18		CHT	1	2019-11-18		44	1	0	0	0
902	Temotu	PCV	29/1/18		PNC	1	2019-11-18		43	2	0	0	0
902	Temotu	PCV	30/1/18		CWC	1	2019-11-18		41	2	0	0
902	Temotu	PCV	30/1/18		F/up immu	1	2019-11-18		39	1	0	0
902	Temotu	PCV	2018-05-02		PNC	1	2019-11-18		38	10
902	Temotu	PCV	2018-12-02		PNC	1	2019-11-18		28	2
902	Temotu	PCV	13/2/18		CWC	1	2019-11-18		26	17
902	Temotu	PCV	19/2/18		PNC	1	2019-11-18		9	5
902	Temotu	PCV	20/2/18		CWC	1	2019-11-18		4
501	Guadalcanal	TETOX	2017-02-04			1	2017-12-01		310		310			stock take
501	Guadalcanal	TETOX	2017-07-04	NMS	avuavu	1	2018-09-01		1110		1110			stock take
501	Guadalcanal	TETOX	2017-11-04	AAHC		1			1100					stock take
501	Guadalcanal	TETOX	18/4/17	AAHC	Breogho	1			1090					stock take
501	Guadalcanal	TETOX	22/5/17	AAHC	Breogho	1			1070					stock take
501	Guadalcanal	TETOX	23/5/17	AAHC		1			1068					stock take
501	Guadalcanal	TETOX	24/5/17	AAHC	matrastaho	1			1018		50			stock take
501	Guadalcanal	TETOX	2017-10-06	AAHC	kana	1			968					stock take
501	Guadalcanal	TETOX	25/7/18	AAHC					957		10			stock take
501	Guadalcanal	TETOX	2017-08-08	AAHC	kolaha	1		220	747					stock take
501	Guadalcanal	TETOX	19/10/17	AAHC		1	2017-12-01		53					vials
501	Guadalcanal	PCV	2017-02-04	NMS	avuavu	1	2018-11-01	150	150		150			stock take
501	Guadalcanal	PCV	2017-11-04	AAHC		1			142	8	142			stock take
501	Guadalcanal	PCV	17/4/17			1	2019-11-18		137	5	137			stock take
501	Guadalcanal	PCV	18/4/17	AAHC	Breogho	1			117	20	117			stock take
501	Guadalcanal	PCV	24/4/17	AAHC					99	17	99			stock take
501	Guadalcanal	PCV	2017-07-05	AAHC		1			97	2				stock take
501	Guadalcanal	PCV	2017-09-05	AAHC					92	5				stock take
501	Guadalcanal	PCV	2017-10-05						70	22				stock take
501	Guadalcanal	PCV	29/5/17	AAHC		1			67	3				stock take
501	Guadalcanal	PCV	29/5/17	AAHC	modachoho	1	2019-11-18		52		15			stock take
501	Guadalcanal	PCV	2017-03-07	AAHC		1	2019-11-18		51	1				stock take
501	Guadalcanal	PCV	13/6/17	AAHC		1	2019-11-18		22					stock take
501	Guadalcanal	PCV	20/6/17	AAHC	kana	1			3	19
501	Guadalcanal	PCV	2017-11-07	NMS	avuavu	1	2019-11-18		250					stock take
501	Guadalcanal	PCV	25/7/17	AAHC		1	2019-11-18		237	13				stock take
501	Guadalcanal	PCV	25/7/17	AAHC		1	2019-11-18		228	9				stock take
501	Guadalcanal	PCV	2017-01-07	AAHC		1	2019-11-18		227	1				stock take
501	Guadalcanal	PCV	2017-08-08	AAHC	koleala	1	2019-11-18	75	152					stock take
501	Guadalcanal	PCV	20/8/17	AAHC		1	2019-11-18	23	129	23				stock take
501	Guadalcanal	PCV	29/8/17	AAHC		1	2019-11-18	1	128	22				stock take
501	Guadalcanal	PCV	19/10/17	AAHC		1	2019-11-18		158					stock take
501	Guadalcanal	PENTA	2017-02-04	NMS	avuavu	1	2019-09-17	150	150		150			stock take
501	Guadalcanal	PENTA	2017-11-04	AAHC		1	2019-09-17		138	12	138			stock take
501	Guadalcanal	PENTA	17/4/17			1	2019-09-17		134	4	134			stock take
501	Guadalcanal	PENTA	18/4/17	AAHC	Breogho	1	2019-09-17		122	12	122			stock take
501	Guadalcanal	PENTA	25/4/17	AAHC		1	2019-09-17		118	4				stock take
501	Guadalcanal	PENTA	2017-02-05	AAHC		1	2019-09-17		116	2				stock take
501	Guadalcanal	PENTA	2017-09-05	AAHC		1	2019-09-17		112	4				stock take
501	Guadalcanal	PENTA	16/5/17	AAHC		1	2019-09-17		96	16				stock take
501	Guadalcanal	PENTA	23/5/17	AAHC		1	2019-09-17		93	3				stock take
501	Guadalcanal	PENTA	23/5/17	AAHC	MOLOCHOHO	1	2019-09-17		78		15			stock take
501	Guadalcanal	PENTA	30/5/17	AAHC		1	2019-09-17		77	1				stock take
501	Guadalcanal	PENTA	13/6/17	AAHC		1	2019-09-17		55					stock take
501	Guadalcanal	PENTA	20/6/17	AAHC	KANA	1	2019-09-17		50	5				stock take
501	Guadalcanal	PENTA	2017-11-07	NMS	avuavu	1	2019-11-19	250	300
501	Guadalcanal	PENTA	2017-11-07	AAHC		1	2019-11-19		288	12				STOCK TAKE
501	Guadalcanal	PENTA	25/7/17	AAHC		1	2019-11-19		276	12				STOCK TAKE
501	Guadalcanal	PENTA	2017-01-08	AAHC		1	2019-11-19		275					STOCK TAKE
501	Guadalcanal	PENTA	2017-08-08	AAHC	KOLEALA	1	2019-11-19	75	200					STOCK TAKE
501	Guadalcanal	PENTA	22/8/17	AAHC		1	2019-11-19	22	178	22				STOKE TAKE
501	Guadalcanal	PENTA	29/8/17	AAHC		1	2019-11-19	1	177	1				STOKE TAKE
501	Guadalcanal	PENTA	19/9/17	AAHC		1	2019-11-19		110					STOKE TAKE
501	Guadalcanal	IPV	2017-02-04			1	2019-11-17		21		21			STOKE TAKE
501	Guadalcanal	IPV	2017-07-04	NMS	avuavu	1	2019-11-17	90	111		111			STOKE TAKE
501	Guadalcanal	IPV	17/4/17			1	2019-11-17		110	1	110			STOKE TAKE
501	Guadalcanal	IPV	18/4/17	AAHC		1	2019-11-17		109	1	109			STOKE TAKE
501	Guadalcanal	IPV	25/4/17	AAHC		1	2019-11-17		106	3	106			STOKE TAKE
501	Guadalcanal	IPV	2017-09-05	AAHC		1	2019-11-17		105	1				STOKE TAKE
501	Guadalcanal	IPV	25/5/17			1	2019-11-17		103	2				STOKE TAKE
501	Guadalcanal	IPV	28/5/17	AAHC	MADACHOHO	1	2019-11-17		83		20			STOKE TAKE
501	Guadalcanal	IPV	13/6/17	AAHC		1	2019-11-17		80					STOKE TAKE
501	Guadalcanal	IPV	20/6/17	AAHC	kana	1	2019-11-17		57	23				STOKE TAKE
501	Guadalcanal	IPV	2017-08-08	AAHC	kolaha	1	2019-10-17	28	119					STOKE TAKE
501	Guadalcanal	IPV	22/8/17	AAHC				1	84	8			12	STOKE TAKE
501	Guadalcanal	IPV	19/10/17	AAHC		1	2019-10-17		99					STOKE TAKE
501	Guadalcanal	HEP B	2017-02-04	AAHC		1	18/2/17		20		20	20	20	stock take
501	Guadalcanal	HEP B	2017-02-04	AAHC		1	18/2/17		52		52			stock take
501	Guadalcanal	HEP B	2017-02-04	AAHC		1	18/2/17		70		70			STOCK TAKE
501	Guadalcanal	HEP B	2017-02-04			1	18/2/17		122		122
501	Guadalcanal	HEP B	2017-07-04	NMS	avuavu	1		17	80		80			STOCK TAKE
501	Guadalcanal	HEP B				1			202		202			STOCK TAKE
501	Guadalcanal	HEP B	18/4/17	BARANGHO		1			200		200			STOCK TAKE
501	Guadalcanal	HEP B	16/5/17	AAHC		1			197		1			STOCK TAKE
501	Guadalcanal	HEP B	23/5/17	MALACHOHO		1			107		10			STOKE TAKE
501	Guadalcanal	HEP B	13/6/17	AAHC					106					STOKE TAKE
501	Guadalcanal	HEP B	20/6/17	AAHC	kana	1			103	3				STOKE TAKE
501	Guadalcanal	HEP B	2017-11-07	NMS	avuavu	1	20/10/17	20	123	3
501	Guadalcanal	HEP B	2017-11-07	AAHC		1	20/10/17		120					STOKE TAKE
501	Guadalcanal	HEP B	25/7/17	AAHC		1	20/10/17		117	2				STOKE TAKE
501	Guadalcanal	HEP B	2017-08-08	AAHC	kana	1	20/10/17	30	87					STOKE TAKE
501	Guadalcanal	HEP B	22/8/17	AAHC		1	20/10/17	7	80	7				STOKE TAKE
501	Guadalcanal	HEP B	19/10/17	AAHC		1	2019-01-05		50					STOKE TAKE
501	Guadalcanal	BCG	2017-02-04	NMS	avuavu	1	2019-10-17		350		350			STOKE TAKE
501	Guadalcanal	BCG	18/4/17	AAHC		1	2019-08-19		1320	2	1320			STOKE TAKE
501	Guadalcanal	BCG	2017-02-05	AAHC		1	2019-08-17		1390	1			9 AMPOULS	STOKE TAKE
501	Guadalcanal	BCG	13/6/17	AAHC		1	2019-10-17		139	21			19	BALANCE BROUGHT FORWARD
501	Guadalcanal	BCG	20/6/17	AAHC	kana	1	2019-10-17		29	60				STOKE TAKE
501	Guadalcanal	BCG	2017-11-07	NMS	avuavu	1	2019-10-17	25	24					STOKE TAKE
501	Guadalcanal	BCG	25/7/17	AAHC		1	2019-10-17		22					STOKE TAKE
501	Guadalcanal	BCG	2017-01-08	AAHC		1	2019-10-17		20					STOKE TAKE
501	Guadalcanal	BCG	2017-06-08	AAHC	KOLODA	1	2019-10-17	9	11	14			6	STOKE TAKE
501	Guadalcanal	BCG	22/8/17	AAHC		1	2019-10-17	2	7	2				STOKE TAKE
501	Guadalcanal	BCG	29/8/17	AAHC		1	2019-10-17		20					STOKE TAKE
501	Guadalcanal	HEP B	15/2/18	GP	avuavu	1	2019-11-19		128					STOKE TAKE
501	Guadalcanal	HEP B	25/2/18	AAHC	NAHO	1	2019-11-19		112					STOKE TAKE
501	Guadalcanal	HEP B	13/3/18		avuavu	1	2019-11-19		109	3				STOKE TAKE
501	Guadalcanal	HEP B	20/3/18		avuavu	1	2019-11-19		108
501	Guadalcanal	HEP B	27/3/18		AVUAVU CWC	1	2019-11-19		107
501	Guadalcanal	HEP B	2018-01-05		CWC	1	2019-11-19		106	1
501	Guadalcanal	HEP B	2018-08-08	AAHC		1	2019-02-19	300	299	1			9	STOKE TAKE
501	Guadalcanal	HEP B	15/2/18	GP	AAHC	1	2018-08-01	65	65					STOKE TAKE
501	Guadalcanal	HEP B	25/2/18	AAHC	NAHO	1	2019-08-18	3	62					STOKE TAKE
501	Guadalcanal	HEP B	27/2/18		AAHC	1			61	4			6
501	Guadalcanal	HEP B	13/3/18	AAHC		1	2019-08-18		59	8			2	STOKE TAKE
501	Guadalcanal	HEP B	20/3/18	CWC AVU		1	2019-08-18		58	3			7	STOKE TAKE
501	Guadalcanal	HEP B	27/3/18	CWC AVU		2	2019-08-18			6			4	STOKE TAKE
501	Guadalcanal	HEP B	2017-01-05	CWC AVU		1	2019-08-18		57	2			6
501	Guadalcanal	HEP B	23/5/17	CWC AVU		1	2019-08-18		56	10
501	Guadalcanal	HEP B	19/6/18	AAHC		1	2019-08-18		55	6			4	STOKE TAKE
501	Guadalcanal	HEP B	26/6/18			1	2019-08-18		54	7			3	STOKE TAKE
501	Guadalcanal	HEP B	2018-03-07			1	2019-08-18		53	8			2
501	Guadalcanal	HEP B	2018-04-07	NAHO	AAHC	1	2019-01-05	10	30
501	Guadalcanal	HEP B	2018-08-08	AAHC		1	2019-05-18	40	40
501	Guadalcanal	HEP B	16/8/18	HQ EPI	ZONES CLINIC	1	2019-05-18	40	80
501	Guadalcanal	OPV	15/2/18	GP	AAHC	1			96					STOKE TAKE
501	Guadalcanal	OPV	25/2/18	AAHC	NAHO	1	2019-08-19		86					STOKE TAKE
501	Guadalcanal	OPV	27/2/18		AAHC	1	2019-08-19		85	1
501	Guadalcanal	OPV	13/8/18		AAHC	1	2019-08-18		75	10				STOKE TAKE
501	Guadalcanal	OPV	21/8/18		AAHC	1	2019-08-18		74	1
501	Guadalcanal	PENTA	19/6/18	AAHC	CWC	1	2019-12-19		114	7
501	Guadalcanal	PENTA	26/6/18	AAHC	CWC	1	2019-12-19		107	2
501	Guadalcanal	PENTA	26/6/18	AAHC	CWC	1	2019-12-19		105	3
501	Guadalcanal	PENTA	2018-03-07	AAHC	CWC	1	2019-12-19		97	8
501	Guadalcanal	PENTA	2018-08-08			1	2019-12-19		96					STOKE TAKE
501	Guadalcanal	PENTA	16/8/18	EPI	ZONES CLINIC	1	2019-12-19	200	200
501	Guadalcanal	PCV	15/2/18	GP	AAHC	1	2019-11-19		156	21				STOKE TAKE
501	Guadalcanal	PCV	25/2/18	AAHC	NAHO	1	2019-11-19		136
501	Guadalcanal	PCV	27/2/17		AAHC	1	2019-11-19		132	4				STOKE TAKE
501	Guadalcanal	PCV	13/3/18		AAHC	1	2019-11-19		127	5
501	Guadalcanal	PCV	20/3/18		CWC	1	2019-11-19		124	3				STOKE TAKE
501	Guadalcanal	PCV	27/3/18		CWC	1	2019-11-19		118	6
501	Guadalcanal	PCV	2018-01-05		CWC	1	2019-12-19		116	2
501	Guadalcanal	PCV	23/5/18		CWC	1	2019-12-19		114	2
501	Guadalcanal	PCV	2018-08-08	AAHC		1			50
501	Guadalcanal	PCV	16/8/18	GP	ZONES CLINIC	1	20/1/20		200					STOCK TAKE. No complete report.

## Sheet: Facility survey 
Facility code	Date	target po_year	target pop_all	Target pop_1	target pop_5	6_fixed base	7_fixed base other specify	8_satellite	9_steillite times	10_satellaite times_ oth sp	11_ National policy	12_ other training info	13_vaccine request	14_vaccine request_no doses	15_Vaccine request target po	16_vaccine request_ don’t know	17_ vacccine request_oth specity	18_freq of vacccine supply	19_freq supply_oth specify	20_current MDVP	21_mdvp _Hep B	22_mdvp_OPV	23_mdvp_Td	24_cal wasatage	25_freq waastage cal	26_freq_wastage cal	27_vaccine supply afftected by wastage	28_vacc suppkly constarined by storage	29_wasatge due to cold chain	30_vaccine stockouts	31_SO_bcg	32_so_hepB	33_so_OPV	34_so_hpv	35_SO_penta	36_so_pcv	37_so_MR	38_so_td	39_so_ipv	40_supervisory vist	41_temp monitoring	42_temp_oth spy	44_bcg count	bcg expired	bcg_expiry date	BCG_last record date	bcg_last stock count	hep_conut	hepb_expired
401	2019-08-16		151	25	48	1		1	5		1	1	2	1	1	2		2		2	2	2	2	1	4		1	1	1	1	2	2	1	2	2	2	2	2	2	2	1		450	0	2020-02-01	2019-08-12	450	50	0
402	2019-08-13	2018		57		2		2			1	1	1	0	0	0	based on registration cwc	1		2				1	1		2	2	2	2										2	4		0
403	2019-08-12	0	0	0	0	0					1	2																													4		0	80	2019-02-01
404	2019-08-19		500		61	2		2			1	2	1	2	2	2	last vaccine supply	1		2	2	2	2	2	6		1	2	1	1	2	2	2	1	2	2	2	1	1	1	1		40		2020-02-01			40
405	2019-08-13					4		1	1		3	2	1	1	1	2		4	weekly but depends on number that need vaccine	1	2	1	1	1	1		2	2	1	1			1				1			2	2		2000	0	2020-02-01			232	250
501	2019-08-13	0	0	0	0	1		1	3		1	1	1	1	1					1	2	1	1	2	6		2	2	2	1	1	2	1	2	2	2	1	2	2	1	1		200					240	2021-03-14
502	2019-08-22	0	0	0	0	1		1	8	depend on if vaccines are provided	2	2	1					4	depend on stock	1	2	2	1	2	6		1	1	2	1	2	2	1	2	1	1	2	2	2	1	3		20		2021-06-01			0
503	2019-09-13		300			1		1	8	integration with church	2	1	1	2	1	2		2		2							1	1	1	1	2	2	1	2	2	2	2	2	2	2	1		40		2020-02-01			0	0
504	2019-07-30			234		1		1	4		3	2	1	1	2	2		4	weekly	1	1	1	1	1	5	weekly	1	2	2	2										2	2		900		2020-02-01			410	60+ 2 opened unlabeled vials
601	2019-07-31		13280	616	1500	2		1		8/month	1	1	2	2	1	2		1		1	single does	1	1	1	1		1 (measles)	2	2	2										1		twice daily except for weekends	60	0	2020-02-20	2019-07-30	60	10	0
602	2019-07-30					1		2	na		3	1	1	2	1	2		1		2	2	2	2	2	6		2	2	2	1	2	2	1	2	2	2	2	1	2	1	4		5	0	2020-02-01			0	0
603	2019-07-31	2017	14551	612	2602	3		1	7		3	2		2	1	2		1		1	1	1	1	1	4		2	2	2	2										2	2		80	0	2020-02-01			90	0
701	2019-08-12					1		1	7		2	2	1	1			distributed to others	4	depends on stock	1	2	1	1	1	1		2	2	2	2										1	1		1440	0	2020-02-01	2019-05-12		146	0
702	2019-08-13					2		1	1		2	1	2	2	1	2		2		2	2	2	2	2	6		1	1	2	2	2	2	2	2	2	2	2	2	2	2	1		102		2020-02-01			340
703	2019-08-12		6000	1000		1		1	8	5/month	2	2	1	2	1	2		1		1	2	2	1	2	6		2	2	1	1	2	2	1	2	1	1	1	2	2	2	1		140	0	2020-02-01			41	0
704	2019-08-13							1	1		2	2	1	1	2	2		1		2	2	2	2	2	6			2	2	2	2	2	2	2	2	2	2	2	2		4		10		2020-09-01			200
705	2019-08-13					4		1	2		2	2	1	1				3		2	2	2	2	2	6		1	1	2	1	1	1	2	2	2	1	2	2	1	1	3		40		2020-02-01			0
706	2019-08-12	2018	2439			8	SLMS distributes to hf	8		distributes to satellite clinics	3	3	2	2	1	2		1		1	1	1	1	2	6		2	2	1	2										1	5	twice daily except weekends	1680	0	2020-02-01	2019-08-09	1680	80	100
801	2019-08-12		5000	120	327	1		1	8		1	1	2	2	1	2		1		1	1	1					1	1	1	1	2	1	1	2	2	2	2	2	1	2	4		660	100	2020-02-01			0	70
802	2019-08-15					2		1	2		2	2	1	1	2	2		4	within 3 months	1	2	2	1	2	6		2	2	2	2										2	4		60		2020-02-01			33
901	2019-08-23			4		1		1	2		1	1	2	2	1	2		4	weekly facility does not have a prper frideg	2				2	4		1	1	1	1										2	5	no fridge
902	2019-08-23					3		1	3		1	1	1	2	1	2		1		1	2	1	1	1	1		1	2	2	1										2	2		20	0	2020-02-01	2019-07-01	20	2	2
[truncated: 38 more columns]
